# Supplementary material for: Large Contributions from Biogenic Monoterpenes and Sesquiterpenes to Organic Aerosol in the Southeastern United States
Source: Copernicus journal article supplement (doi:10.5194/acp-2017-1109), 2018-01-02
Supplement: Supplementary file [file acp-2017-1109-AC1-supplement.pdf]

1 We thank the reviewers for the detailed and insightful comments. We have addressed the reviewers'  
2 comments point by point as indicated below.

3

4 **Reviewer #1:**

5 *This paper shows some interesting results from a novel experiment involving taking ambient air*  
6 *in an urban environment and conducting a chamber experiment after enhancing the*  
7 *concentrations of VOCs. The main emphasis of this paper is the use of  $\alpha$ -pinene and  $\beta$ -*  
8 *caryophyllene, the characterisation of the SOA produced using aerosol mass spectrometry and*  
9 *inferences are drawn regarding their contribution to particulate concentrations in the region.*

10 *1. Overall, this is a nice piece of work and well within the journal's remit. However, I do think*  
11 *that the significance is a little overblown in places and the authors need to express more caution*  
12 *in how they interpret some of the results. In spite of their statements otherwise, this is not a true*  
13 *simulation of atmospheric processes (see below), there are a few PMF-specific subtleties that*  
14 *aren't taken account of and how reliably this can be projected onto the wider world is open to*  
15 *question on a number of levels. But in spite of these issues, the conclusions are largely sound and*  
16 *this deserves to get published. I therefore recommend publication with minor revisions.*

17 Response: We thank the reviewer for the thoughtful insights. To address the reviewer's major  
18 concerns, we have toned down the significance of our conclusions and expanded discussions on  
19 PMF-specific subtleties in the revised manuscript. We think that the lab-in-the-field experiments  
20 can mimic certain atmospheric processes, shed light on understanding the sources of OA factors,  
21 and reflect potential issues that PMF analysis encounters. These responses will be discussed in  
22 detail when we address the reviewer's specific comments. Meantime, we agree with the reviewer  
23 that more studies are warranted to test the reliability of our conclusions to the wider world.

24 *General Comments:*

25 *2. This paper makes the assumption of  $\alpha$ -pinene and  $\beta$ -caryophyllene being representative of*  
26 *monoterpenes and sesquiterpenes respectively. While these are common assumptions made in the*  
27 *community and the VOCs are both very well studied, their overall representativeness is in question*  
28 *because the level of oxidation in SOA from different precursors are known to vary substantially*  
29 *between compounds (Alfarra et al., Atmos. Chem. Phys., 13, 11769-11789, 10.5194/acp-13-*

30 *11769-2013, 2013). This is especially true of the sesquiterpenes, as difficulties in working with a*  
31 *number of these compounds means that we lack data on a large subset of these. This should be*  
32 *discussed and any evidence to support this assumption properly cited.*

33 Response: In this study, we selected  $\alpha$ -pinene and  $\beta$ -caryophyllene as representatives due to the  
34 following reasons. Firstly, both VOCs are widely studied in the literature. Secondly, they are the  
35 most abundant species in monoterpenes and sesquiterpenes, respectively (Guenther et al., 2012;  
36 Helmig et al., 2007). Thirdly, the mass spectra of SOA from VOCs in the same class generally  
37 share similar features. For example, the correlation coefficient (i.e., R) between the mass spectra  
38 of SOA from the  $\beta$ -caryophyllene and  $\alpha$ -humulene is 0.97 (Bahreini et al., 2005). Still using the  
39 mass spectra reported in Bahreini et al. (2005), the R between  $\alpha$ -pinene SOA and other  
40 monoterpenes SOA ( $\beta$ -pinene,  $\alpha$ -terpinene, myrcene, and terpinolene) is larger than 0.9. Fourthly,  
41 in addition to the similar mass spectra, the time series of  $\alpha$ -pinene in the southeastern U.S. is similar  
42 to that of other monoterpenes, such as  $\beta$ -pinene and camphene (Xu et al., 2015a). The above  
43 reasons have been added in the revised SI. We also add a caveat that future studies using other  
44 monoterpenes and sesquiterpenes are still in need.

45 We agree with the reviewer that many properties of SOA (i.e., yield, hygroscopicity, etc)  
46 from different monoterpenes or sesquiterpenes are different. To be precise, we have replaced  
47 “representative” with “important” in some sentences in the revised manuscript.

48 *3. Throughout the manuscript, there is a general tendency to treat LO-OOA and MO-OOA as*  
49 *defined chemical entities, whereas the truth is that these represent reductions of highly complex*  
50 *chemical systems and the exact factors reported are known to vary dataset to dataset. While*  
51 *common trends have been noted in terms of behaviour and mass spectral profile, their exact mass*  
52 *spectral nature depends on the measurement location and season and in many cases (particular*  
53 *in the wintertime), PMF will fail to separate them at all, instead returning a single OOA factor.*  
54 *This must be discussed in a meaningful manner in the introduction and discussion because it adds*  
55 *an extra layer of nuance to the results.*

56 Response: We agree with the reviewer that OA factors from PMF analysis represent complex  
57 chemical systems. Understand what these OA factors represent is one of many motivations of this  
58 study. In the revised manuscript, we have modified the language to avoid the confusion to treat  
59 OA factors as defined chemical entities. We also agree with the reviewer that the exact mass

60 spectral nature of OA factors varies with locations. We would like to point out that the mass spectra  
61 of LO-OOA are highly similar ( $R > 0.95$ ) across all the seven datasets in our study (Fig. R1). This  
62 is one of many evidence to suggest that LO-OOA at different datasets may have similar sources.  
63 Regardless, we clearly limit our conclusions to the southeastern U.S.

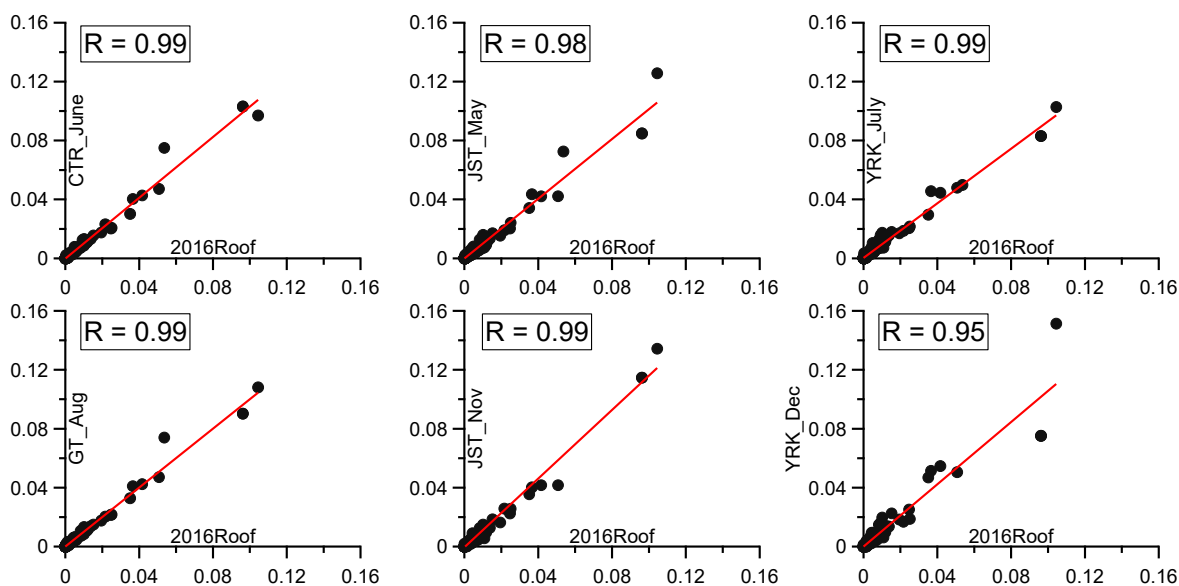

64  
65 Fig. R1. The correlation plot between the mass spectrum of LO-OOA for 2016 rooflab perturbation  
66 study and the LO-OOA obtained in other six ambient datasets in the southeastern U.S.

67 In the introduction and implications sections of the revised manuscript, we have added the  
68 discussion that a single OOA factor is resolved in some cases, especially in winter.

69 *4. Related to the above point, there seems to be a general assumption that PMF had adequately*  
70 *accounted for the new SOA being formed, but in my mind, the decrease in MO-OOA in response*  
71 *to the  $\beta$ -caryophyllene experiments in particular raises a number of red flags because this implies*  
72 *that the data model didn't hold and the factorization wasn't sound. The authors need to pay much*  
73 *closer attention to whether the factorisations 'worked' or not; a good starting point would be*  
74 *inspecting the residuals (e.g.  $Q/Q_{exp}$ ) as a function of time over the course of the experiments and*  
75 *if they positively correlate at all with the amount of additional SOA, this would imply that PMF*  
76 *has failed to capture the chemistry perfectly.*

77 Response: We agree with the reviewer that the decrease in MO-OOA after  $\beta$ -caryophyllene  
78 injection raises a red flag and implies that factorization is not perfect. We have examined the PMF

79 residual (i.e.,  $Q/Q_{\text{exp}}$ ) in  $\alpha$ -pinene and  $\beta$ -caryophyllene perturbation experiments. As shown in Fig.  
80 R2a, in  $\alpha$ -pinene experiments, the difference in  $Q/Q_{\text{exp}}$  between “Chamber\_Bf” (before  $\alpha$ -pinene  
81 injection) and “Chamber\_Af” (after  $\alpha$ -pinene injection) is not statistically significant. This  
82 suggests that PMF analysis has adequately accounted for the newly formed  $\alpha$ -pinene SOA. This is  
83 consistent with the observation that in  $\alpha$ -pinene experiments, no OA factors show unexpected  
84 dramatic decrease after  $\alpha$ -pinene injection.

85 In contrast, in  $\beta$ -caryophyllene experiments, there is a clear pattern that  $Q/Q_{\text{exp}}$  in  
86 “Chamber\_Af” is larger than that in “Chamber\_Bf” (Fig. R2b). This is likely because of the rapid  
87 change in the subtleties of OA composition caused by the newly formed  $\beta$ -caryophyllene. However,  
88 the behavior of  $Q/Q_{\text{exp}}$  is not quite expected because the OA mass spectra after injecting  $\beta$ -  
89 caryophyllene are almost identical to those before perturbation (i.e., R between Chamber\_Bf and  
90 Chamber\_Af is  $>0.99$  as shown in Fig. R3b). The larger  $Q/Q_{\text{exp}}$  in  $\beta$ -caryophyllene experiments  
91 than  $\alpha$ -pinene experiments may be a result of that  $\Delta\text{OA}$  (i.e., the difference in OA concentration  
92 between “Chamber\_Af” and “Chamber\_Bf”) is larger in  $\beta$ -caryophyllene experiments (average  
93 value  $1.95 \mu\text{g m}^{-3}$  over 6 experiments) than  $\alpha$ -pinene experiments (average value  $0.98 \mu\text{g m}^{-3}$  over  
94 14 experiments). Regardless, under the simulated circumstances, PMF analysis cannot adequately  
95 capture the newly formed  $\beta$ -caryophyllene SOA.

96 We would like to clarify that our conclusions are not dependent on if PMF has perfectly  
97 accounted for the newly formed SOA, mainly because similar issues could also happen in the  
98 analysis of ambient data. The  $\beta$ -caryophyllene perturbation experiments simulate a scenario when  
99 there is a sudden change in the OA composition caused by an air mass encountering a plume or  
100 change in OA sources due to shift in wind direction. Under these circumstances, PMF analysis  
101 may have difficulty in accurately apportioning the OA sources. The simulated scenarios and the  
102 observed PMF issues have been observed in previous studies. For example, in the Figure 9 of Sun  
103 et al. (2016), an increase of hydrocarbon-like OA (HOA) is usually accompanied by a decrease in  
104 cooking OA (COA) and vice versa. Another example is that figure 5 of Reyes-Villegas et al. (2018)  
105 showed that a biomass burning plume leads to unexpected rapid variations in the concentration of  
106 many OA factors on the time scale of minutes. Last example is that in the figure S10 of Milic et  
107 al. (2017), the PMF residual during a biomass burning plume is orders of magnitude higher than  
108 other sampling periods. Emphasizing the limitations of PMF analysis is one goal of this study.

109

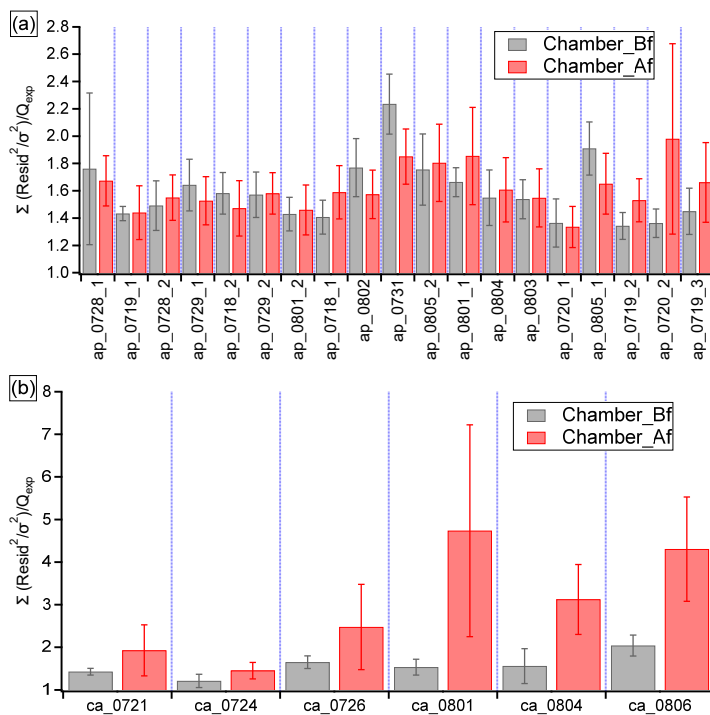

110

111 Fig. R2. The PMF residual ( $Q/Q_{\text{exp}}$ ) during “Chamber\_Bf” and “Chamber\_Af” periods for (a)  $\alpha$ -

112

pinene and (b)  $\beta$ -caryophyllene perturbation experiments.

113

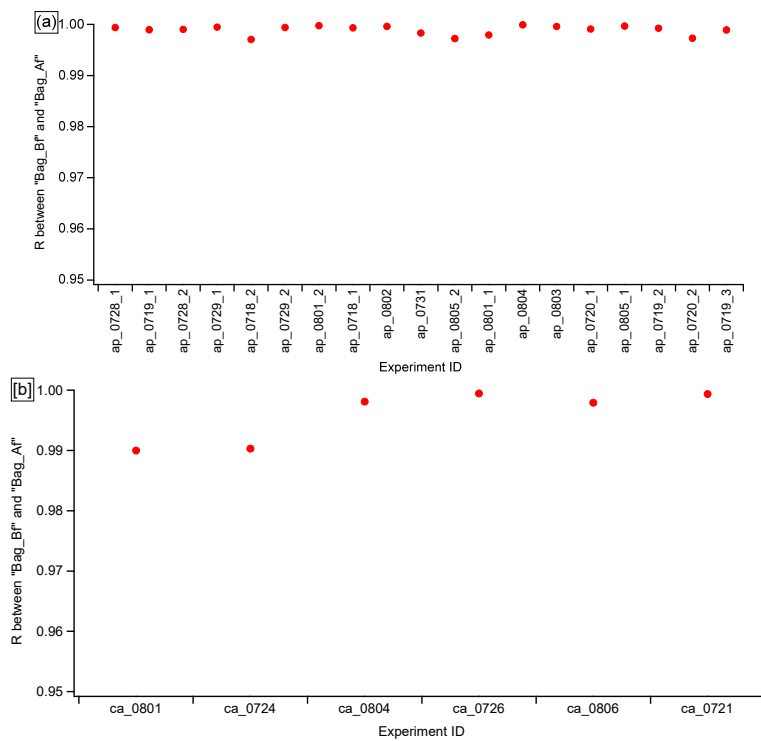

114

115 Fig. R3. The correlation coefficient by comparing the OA mass spectra between “Chamber\_Bf”

116

and “Chamber\_Af” in (a)  $\alpha$ -pinene and (b)  $\beta$ -caryophyllene perturbation experiments.

117 5. The modelling work presented in section 3.6 left me slightly confused as to what the authors  
118 were trying to achieve and how. The text in the main article would suggest that an updated scheme  
119 is being compared with a very old one, but the supplement seems to say that specific mechanisms  
120 have been added here. This must be clarified.

121 Response: We use the modelling work as one of the evidence to support our hypothesis that the  
122 major source of LO-OOA in this region is the oxidation of MT and SQT by various oxidants. In  
123 section 2.6, we described two simulations (i.e. “default simulation” and “updated simulation”) with  
124 different organic aerosol treatment. Compared to “default simulation”, we incorporate two recent  
125 findings in the “updated simulation”. Firstly, we implemented MT+NO<sub>3</sub> chemistry to explicitly  
126 account for semivolatile organic nitrate compounds that contribute to SOA. Secondly, we  
127 improved the parameterization of SOA formation from MT+O<sub>3</sub>/OH based on a recent study by  
128 Saha and Grieshop (2016). In section 3.5 of revised manuscript, we pointed out that SOA<sub>MT+SQT</sub>  
129 in the updated simulation reasonably reproduces the magnitude and diurnal variability of LO-OOA  
130 for each site. The model bias is within ~20%. The reasonable agreement between modeled  
131 SOA<sub>MT+SQT</sub> and LO-OOA at multiple sites and in different seasons serves as one piece of evidence  
132 to support our hypothesis that LO-OOA largely arises from the oxidation of MT and SQT in the  
133 southeastern U.S.

134 6. Also, as pointed out later in this section, this work does not directly preclude that other  
135 precursors may be contributing and the discussion dealing with this relies heavily on inferences  
136 drawn from the literature, so this work isn't really that dramatic a result in how it is presented  
137 now. I would suggest a more defined modelling experiment is constructed around a clear working  
138 hypothesis. This could just be a case of making the work shown here clearer and moving material  
139 from the supplement to the main article.

140 More generally, I noted a very odd tendency to leave certain pertinent (and in many cases  
141 interesting) details in the supplement that maybe should have been given more prominence or at  
142 least linked to the main article better. For example, the box modelling described in section S6 was  
143 very interesting, but it wasn't clear at all how this fit into the narrative of the main article. I also  
144 had a hard time reconciling the information about the CMAQ runs in the main article and the  
145 supplement as well (see above). I would revise what information goes where, using the main article

146 *for the discussions relating to the scientific arguments and making sure the material in the*  
147 *supplement is purely technical detail in support of this.*

148 Response: We have toned down the significance of conclusions in the revised manuscript. We  
149 have also re-organized the main text and SI, and improved the linkage between two parts. Many  
150 details, although interesting, are kept in the Appendix or SI, because we prefer to focus on the  
151 main message and keep the logic of manuscript easy to follow.

152 *Specific comments:*

153 *7. Line 95: When saying ‘representative urban’, please be specific about what type of urban site*  
154 *this (e.g. background) and how you qualify this statement.*

155 Response: We have deleted the word “representative”.

156 *8. Line 115: What counts as ‘too much’ SOA and why?*

157 Response: As discussed in response to reviewer’s comment #4, when there is a sudden change in  
158 the OA composition, PMF analysis may have difficulty in accurately apportioning the OA sources,  
159 as shown in  $\beta$ -caryophellene perturbation experiments and previous studies. This is why we tried  
160 to avoid producing too much SOA in the perturbation experiments.

161 It is challenging to quantify what counts as “too much”. As shown in  $\beta$ -caryophellene  
162 perturbation experiments, even though (1) the newly formed  $\beta$ -caryophyllene SOA only increases  
163 the OA concentration by roughly  $2 \mu\text{g m}^{-3}$  and (2) the OA mass spectra after injecting  $\beta$ -  
164 caryophyllene are almost identical to those before perturbation (i.e.,  $R > 0.99$  as shown in Fig. R3b),  
165 PMF analysis encounters difficulty in accurately apportioning the OA sources.

166 *9. Line 265: It has long been shown that  $\alpha$ -pinene SOA produced in chambers produces a mass*  
167 *spectrum that is similar to LO-OOA and given that this mass spectral profile is also seen in the*  
168 *presence of strong emitters of this VOC (e.g. temperate and boreal forests), the case for*  
169  *$\alpha$ -pinene SOA being a strong contributor to LO-OOA has never really been in doubt in this*  
170 *reviewer’s opinion. Why is the evidence presented here any more ‘direct’ than those published*  
171 *previous? While the perturbation experiment does indeed produce LO-OOA as retrieved using*  
172 *PMF, this retrieval is still based solely on mass spectral similarity, so I would contend that this*  
173 *does not really present any new evidence to this effect.*

174 Response: We thank the reviewer for pointing this issue out. The “directness” of our conclusions  
175 is not clearly communicated in the original manuscript and caused some confusions. While we  
176 acknowledge that the mass spectra comparison approach largely improves our understanding of  
177 OA factors, we think that the perturbation experimental approach provides more objective and  
178 quantitative conclusions by addressing some limitations of the mass spectra comparison approach.  
179 The mass spectra comparison approach has the following limitations. Firstly, the similarity  
180 between two mass spectra is a subjective determination. In other words, what correlation  
181 coefficient  $R$  value implies SOA from a certain source contributes to one OA factor? For example,  
182 the  $R$  values between laboratory-generated  $\alpha$ -pinene SOA (using HONO as OH source) with LO-  
183 OOA, isoprene-OA, and MO-OOA in this study are 0.96, 0.88, and 0.81, respectively. Using these  
184  $R$  values to imply whether  $\alpha$ -pinene SOA contributes to a certain OA factor or not is subjective.  
185 As another example, Jimenez et al. (2009) showed that the mass spectrum of  $\alpha$ -pinene SOA  
186 becomes more similar to that of MO-OOA (i.e., LV-OOA in older study) than that of LO-OOA  
187 (i.e., SV-OOA in older study) with photochemical aging. The ability to determine when and how  
188 much  $\alpha$ -pinene SOA is apportioned to MO-OOA based on an  $R$  value is subjective. Secondly, the  
189 conclusions from mass spectra comparison approach are qualitative. Even if the mass spectrum of  
190  $\alpha$ -pinene SOA is the most similar to LO-OOA, this similarity does not guarantee that all  $\alpha$ -pinene  
191 SOA is apportioned into LO-OOA and this similarity does not provide information regarding what  
192 fraction of  $\alpha$ -pinene SOA is apportioned into LO-OOA.

193 The perturbation experiments could address the limitations of mass spectra comparison  
194 approach and provide more objective and quantitative conclusions. Firstly, the perturbation  
195 experiments simulate a short period of time with increasing  $\alpha$ -pinene SOA concentration. we  
196 perform PMF analysis on the combined ambient data and perturbation data. PMF analysis does  
197 not distinguish SOA from natural  $\alpha$ -pinene vs. from injected  $\alpha$ -pinene, so that PMF analysis can  
198 objectively apportion  $\alpha$ -pinene SOA into factors. Thus, the conclusions from the perturbation  
199 experiments are directly drawn without any subjective judgement on the similarity in mass spectra.  
200 Secondly, using the perturbation data, we attempt to quantify the fraction of fresh  $\alpha$ -pinene SOA  
201 that is apportioned into different factors (i.e., ~80% into LO-OOA, ~20% into isoprene-OA, 0%  
202 into MO-OOA, COA, and HOA). Although further studies are required to extrapolate the  
203 conclusions from perturbation experiments to real atmosphere, a similar quantitative  
204 understanding cannot be obtained from simple mass spectra comparison approach. Thirdly, the



205 perturbation experiments have the potential to utilize subtle differences across the entire the mass  
206 spectrum to evaluate the sources of OA factors. Based on previous laboratory study, the mass  
207 spectrum of  $\alpha$ -pinene SOA is highly correlated ( $R = 0.97$ ) with that of  $\beta$ -caryophyllene SOA  
208 (Bahreini et al., 2005). Using a mass spectra comparison approach would suggest that these mass  
209 spectra are too similar to be differentiated by PMF analysis. However, perturbation experiments  
210 show different behaviors of  $\alpha$ -pinene SOA and  $\beta$ -caryophyllene SOA. That is, a fraction of the  
211 fresh  $\beta$ -caryophyllene SOA is apportioned into COA factor, but similar behavior is not observed  
212 for  $\alpha$ -pinene SOA. The different behaviors are likely due to the subtle differences in their mass  
213 spectra. For example,  $f_{55}$  (i.e., the ratio of  $m/z$  55 to total signal in the mass spectrum) is typically  
214 higher in  $\beta$ -caryophyllene SOA than  $\alpha$ -pinene SOA (Bahreini et al., 2005; Tasoglou and Pandis,  
215 2015), and the mass spectrum of COA is characterized by prominent signal at  $m/z$  55 (Fig. 2).  
216 Overall, the perturbation experiments provide more objective and quantitative insights into the  
217 sources of OA factors than traditional mass spectra comparison approach.

218 We have added the above discussions in the revised manuscript.

219 *10. Line 280: The fact that the oxidation rate of VOCs is dependent on oxidant concentration is*  
220 *very well established in kinetics. The discussion regarding this observation would be considered*  
221 *pointing out the obvious to many. It would be far more useful if a quantitative relationship with*  
222 *ozone concentration could be reported here.*

223 Response: In Line 280, we are not making the conclusion that the oxidation rate of VOCs depends  
224 on oxidant concentration. Instead, we use this well-established conclusion to explain our  
225 observation that the LO-OOA enhancement amount correlates with oxidant concentration. As the  
226 SOA formation depends on a number of variables, including temperature, relative humidity, the  
227 concentrations of oxidants,  $\text{NO}_x$ , and existing particles, etc, the VOCs oxidation rate is not  
228 equivalent to SOA formation amount. In this study, the  $\alpha$ -pinene perturbation experiments were  
229 conducted at different times of day (i.e., from 9am to 9pm) and under different conditions (i.e., T,  
230 RH, oxidant,  $\text{NO}_x$ , etc). Despite the large difference in reaction conditions, the LO-OOA  
231 enhancement amount correlates well with  $\text{O}_3$  concentration, suggesting that the oxidant  
232 concentration plays a more controlling role in the amount of OA formed in  $\alpha$ -pinene experiments  
233 than other reaction variables do.

234 As a side note, we also want to point out that the oxidant concentration is not the sole  
235 variable in determining the SOA formation from  $\beta$ -caryophyllene, which is in contrast to  $\alpha$ -pinene  
236 experiments. As shown in Fig. S22 in revised SI, the LO-OOA enhancement amount in  $\beta$ -  
237 caryophyllene perturbation experiments is greatly affected by  $\text{NO}_2$  level. For example, for two  
238 experiments with similar  $\text{O}_3$  concentration and injection time, more LO-OOA is formed in the  
239 experiment with a lower  $\text{NO}_2$  level (Fig. S22f in revised SI).

240 *11. Line 286: An alternative explanation here is that the experimental set-up here was not*  
241 *conducive to HOM formation for whatever reason. This should be added as a caveat.*

242 Response: We agree with the reviewer and have added this caveat in the revised manuscript.

243 *12. Line 309: There is a major problem with this statement; the results indicate that the  $\beta$ -*  
244 *caryophyllene SOA spectrum to be represented by PMF as a combination of the LOOOA and COA*  
245 *mass spectra, but it would be a mistake to imply in any way that it is producing two ‘types’ of OA*  
246 *(this is clarified later in the manuscript but it is ambiguous here). Issues about the quality of the*  
247 *PMF retrieval aside (see above), in the hypothetical situation that there is an environment with a*  
248 *mixture of cooking and biogenic SOA, PMF will likely still separate these because it determines*  
249 *factors not just by mass spectral profile but by temporal profile, so would still return factors*  
250 *corresponding to cooking and an average of biogenic SOA from all sources. The only situation I*  
251 *could think where this would be a problem is if monoterpene and sesquiterpene SOA formation*  
252 *were not well matched temporally, in which case I could see how the COA-like component of*  
253 *sesquiterpene SOA would manifest as ‘mixing’ between the cooking and biogenic SOA factors, but*  
254 *this would be evident in the temporal profiles.*

255 Response: We agree with the reviewer that PMF separates factors based on features in both mass  
256 spectrum and time series. However, we note that the temporal variations of COA and SOA from  
257 monoterpenes and sesquiterpenes do not guarantee a clean separation between different sources.  
258 For example, the concentrations of many oxidation products of monoterpenes (e.g. pinonic acid,  
259 pinic acid, etc), COA, and LO-OOA show similar increasing trend near sunset (Allan et al., 2010;  
260 Xu et al., 2015b; Zhang et al., 2018). The emissions of sesquiterpenes and diurnal variations of  
261 sesquiterpene SOA are not well-studied. Thus, it is possible that some sesquiterpene SOA is  
262 apportioned into COA.

263 As mentioned in the manuscript, we agree with that COA is mainly from cooking emissions.  
264 However, the perturbation experiments show the possibility that COA could include  $\beta$ -  
265 caryophyllene SOA. There is no evidence in the literature to support that cooking OA factor is  
266 purely from cooking and does not have any biogenic SOA.

267 *13. Line 350: How much more 'realistic' is this? While this would give a more life-like oxidant*  
268 *and NO<sub>x</sub> background, given that the chamber walls will act as a sink of VOCs, radicals and*  
269 *particles, I would still expect that the precursor perturbations would have to be higher than typical*  
270 *atmospheric concentrations to achieve realistic SOA concentrations and consequently have a*  
271 *higher VOC:NO<sub>x</sub> ratio. This must be discussed in an objective manner and while some of this is*  
272 *touched on in the supplement, it's kind of glossed over in the main article.*

273 Response: We would like to clarify that we did not want to produce realistic SOA concentration.  
274 Instead, we aimed to produce small amount of SOA, which would not significantly perturb the  
275 composition of existing organic aerosol. Based on the chamber volume and injected  $\alpha$ -pinene  
276 volume, we injected about 14ppb  $\alpha$ -pinene. Most of injected  $\alpha$ -pinene is carried out of the chamber  
277 by dilution air and we estimated that only 2-5 ppb  $\alpha$ -pinene is reacted in the chamber. We have  
278 added this information in the main text.

279 *14. Figure 6: The caption of this figure is excessively long.*

280 Response: We prefer to keeping the caption descriptive of the figure, such that the readers could  
281 comprehend the figure after reading the caption.

282 *15. Line S477: This doesn't make sense. Why would the solver reduce the concentration of MO-*  
283 *OOA because it had been added to? I find it more likely that there was a breakdown in the data*  
284 *model and mass was being erroneously rotated out of the factor. This is undesirable, but also feeds*  
285 *into the discussion above regarding the relationship with COA.*

286 Response: As stated in the SI, the reason why MO-OOA decreases after adding  $\beta$ -caryophyllene  
287 is unknown. One possible explanation is that since the mass spectrum of  $\beta$ -caryophyllene SOA is  
288 more similar to LO-OOA than MO-OOA, PMF solver somehow decreases the concentration of  
289 MO-OOA to reduce the overall fitting residual. We agree with the reviewer that this result is  
290 undesirable. However, as pointed out in response to reviewer's comment #4, similar situation  
291 could happen in ambient measurements. This issue deserves more attention.

292 *16. Line S480: What other studies?*

293 Response: Please see response to comment#4.

294 *Technical comments:*

295 *17. Line 113: Please be more specific over which VOCs are anthropogenic vs biogenic. The word*  
296 *'respectively' does not work when four are listed.*

297 Response: We have deleted the word “respectively”.

298 *18. Line 179: Why not saturated fatty acids?*

299 Response: We have deleted the word “unsaturated”, so that the “fatty acids” in the revised sentence  
300 includes both unsaturated and saturated compounds. We have also cited Allan et al. (2010) in this  
301 sentence.

302 *19. Line 119: Correct 'concentration' to 'concentrations'.*

303 Response: We have made this correction in the revised manuscript.

304 *20. Line 184: What are the oxidation states in each instance?*

305 Response: We have added the oxidation states (i.e., -0.70 to -0.34 for LO-OOA and from -0.18 to  
306 0.71 for MO-OOA in the southeastern U.S.) in the revised manuscript.

307 *21. Section 2.2: Please specify the materials used for the aerosol and gas sampling lines.*

308 Response: Teflon tubing and stainless steel tubings were used for gas and aerosol sampling lines,  
309 respectively.

310

311

312

313

314

315

316

317

318

319 **Reviewer #2:**

320 *The manuscript presented by Xu et al. proposes an interesting study on the contribution of the*  
321 *oxidation of alpha-pinene and caryophyllene to the SOA mass observed in the S.E.-US. The*  
322 *characterization of SOA generated in the lab-in-the-field smog chamber was performed using an*  
323 *aerosol mass spectrometer. Overall the work performed in this study is good and fall within the*  
324 *scope of the journal. However, I think the conclusions proposed from the PMF analysis/chamber*  
325 *experiments are not always well sustained and more caution should be taken when extrapolating*  
326 *the results.*

327 Response: We thank the reviewer for the positive comments. In the revised manuscript, we have  
328 added more caveats regarding our conclusions drawn from the perturbation experiments.

329 *General comments*

330 *1. The authors should carefully review their paper and avoid the repetition between the main text*  
331 *and the SI. At many places, sentences are duplicated and are not useful. However, some important*  
332 *details are left within the SI and should be moved to the main manuscript.*

333 Response: We have re-organized the main text and SI, and improved the linkage between two parts.

334 *2. The authors should provide more information in the PMF analysis and provide the elementary*  
335 *checks to validate their analysis. For instance, it is a bit surprising that the factors don't change*  
336 *throughout the experiments (i.e. bf vs af) while significant perturbation has been made to the*  
337 *system. Or do the authors consider/claim that most of the SOA sampled in the ambient are formed*  
338 *from the oxidation of alpha-pinene or caryophyllene? In addition, we could expect that the fresh*  
339 *LO-OOA (formed within a few minutes, without lights) would have different signatures than LO-*  
340 *OAA formed in the atmosphere (aged SOA, formed from different chemistry, ...). How do the*  
341 *factors correlate throughout the experiments: e.g. LO-OOA\_Amb\_Bf vs LO-OOA\_Chamber\_Af?*

342 Response: We respond to the reviewer's comment by addressing some confusions regarding PMF  
343 analysis. Firstly, we performed PMF analysis on the combined ambient and perturbation data. Each  
344 OA factor has a constant mass spectrum throughout the study, regardless of ambient or chamber  
345 periods. In other words, the mass spectra of factors do not change between "Chamber\_Bf" and  
346 "Chamber\_Af". Secondly, we did not introduce significant perturbation to the system. In contrast,  
347 our goal is to produce small amount of SOA, which would not cause dramatic change in the OA

348 composition and would not bias PMF analysis. For example, the difference in average OA  
349 concentration between “Chamber\_Bf” and “Chamber\_Af” is within  $4 \mu\text{g m}^{-3}$  for all perturbation  
350 experiments. Thirdly, we did not consider/claim that most of the SOA sampled in the ambient are  
351 formed from the oxidation of  $\alpha$ -pinene or  $\beta$ -caryophyllene. This assumption is not related to our  
352 conclusions.

353         Regarding the last question in this comment, we believe that the reviewer suggests to  
354 compare the OA mass spectra between “Chamber\_Bf (before VOC injection)” and “Chamber\_Af  
355 (after VOC injection)”. As shown in Fig. R3 (in response to reviewer#1), the mass spectra between  
356 two periods are almost identical, with R larger than 0.99 for all experiments. This is desired  
357 because we do not intend to introduce significant change in the OA composition after perturbation.

358 *3. How do the identified factors correlate with the reference MS? How do the residuals evolve*  
359 *throughout an experiment? How does alpha-pinene-derived LO-OOA correlate with*  
360 *caryophyllene derived LO-OOA? Overall, the authors should provide more statistical analyses in*  
361 *order to give a robust validation of the analysis.*

362 Response: In this study, we resolve and evaluate PMF factors according to the standard procedure  
363 outlined in Zhang et al. (2011). The detailed description on OA factors and justification of PMF  
364 results have discussed in section S3 of SI. As discussed in the SI, the PMF factors have the same  
365 features as those in the literature. More importantly, the PMF results in this study are consistent  
366 with our previous measurements (from 2012 to 2015) at the same site and in similar seasons, as  
367 shown in Fig. S14 in revised SI. The mass spectra of LO-OOA are similar ( $R > 0.95$ ) across all the  
368 seven datasets in this study (Fig. R1 in response to reviewer#1’s comment#3).

369         In  $\alpha$ -pinene perturbation experiments, the PMF residual is not significantly different  
370 between “Chamber\_Bf” and “Chamber\_Af”, suggesting that PMF analysis has adequately  
371 accounted for the newly formed  $\alpha$ -pinene SOA. More detailed discussions can be found in response  
372 to reviewer#1’s comment #4.

373         As noted in response to the reviewer’s comment#2, the mass spectrum of LO-OOA is the  
374 same throughout the study, regardless of ambient vs. perturbation and regardless of  $\alpha$ -pinene vs.  
375  $\beta$ -caryophyllene experiments.

376 4. The authors should report the concentration of the inorganics in their experiments and in case  
377 of significant concentrations of sulfate estimate the aerosol acidity. Indeed, the presence of acidic  
378 aerosols can lead to multiphase reactions (e.g. reactive uptake of IEPOX) that could greatly  
379 impact the SOA composition. In addition, an estimation (modeling?) of the concentrations of other  
380 VOCs would be interesting (especially isoprene). Ozonolysis of alpha-pinene leads to the  
381 formation of OH radicals, which could further react and oxidize alpha-pinene but also other VOCs  
382 present in the ambient air. The authors should discuss this possibility and provide more  
383 information in the background of the chamber/ambient air. As it is, the conclusions proposed in  
384 the paper on the potential increase of the IEPOX-OA or COA factors from the oxidation of alpha-  
385 pinene and caryophyllene, respectively appear speculative (correlations are not sufficient to  
386 validate such trend:  $r \sim 0.5$ ). For instance, the authors could estimate the amount of IEPOX (thus  
387 isoprene) formed in the chamber to explain the formation of IEPOX-OA and check if the numbers  
388 make sense or not.

389 Response: We interpret that the reviewer's key question as the following: "is the enhancement in  
390 isoprene-OA factor due to the oxidation of isoprene in the chamber after injecting  $\alpha$ -pinene?" The  
391 most direct evidence to rule out this hypothesis is that the concentration of IEPOX+ISOPOOH  
392 ( $C_5H_{10}O_3 \cdot I^-$ ) and isoprene hydroxyl nitrates ( $C_5H_9NO_4 \cdot I^-$ ), measured by  $I^-$  HR-ToF-CIMS, did not  
393 change after  $\alpha$ -pinene injection (Fig. S3b in revised SI). This suggests that the  $\alpha$ -pinene injection  
394 does not introduce isoprene oxidation in the chamber.

395 The relatively weak correlation between  $\Delta$ isoprene-OA and  $\Delta$ LO-OOA (where the  $\Delta$   
396 indicates the difference in concentration between the "Chamber\_Af" and "Chamber\_Bf") across  
397 all  $\alpha$ -pinene perturbation experiments is not contradictory to the conclusion that  $\alpha$ -pinene SOA  
398 influences isoprene-OA factor. The weak correlation could be because  $\alpha$ -pinene SOA in different  
399 perturbation experiments were formed under different conditions (e.g.,  $NO_x$ ) and had different  
400 mass spectra (Fig. 7 in revised manuscript). Thus, the fraction of  $\alpha$ -pinene SOA apportioned into  
401 isoprene-OA factor varies with experiments and results in the weak correlation. However, we  
402 would like to point out that although the correlation between  $\Delta$ isoprene-OA and  $\Delta$ LO-OOA across  
403 all  $\alpha$ -pinene perturbation experiments is relatively weak, the time series of isoprene-OA and LO-  
404 OOA in the same  $\alpha$ -pinene perturbation experiment are strongly correlated. The R is 0.88 for the  
405  $\alpha$ -pinene perturbation experiment on 07/20 (Fig. R4a). It is well studied that isoprene produces

406 SOA slower than  $\alpha$ -pinene, as isoprene SOA involves higher-generation products. If the  
407 enhancement in isoprene-OA factor is due to isoprene oxidation, the enhancement is expected to  
408 occur later than the enhancement in LO-OOA, but it is not observed in the experiments. Thus, the  
409 strong correlation between isoprene-OA and LO-OOA in the same  $\alpha$ -pinene perturbation  
410 experiment serves as another evidence that the enhancement in isoprene-OA factor is due to  
411 interference from newly formed  $\alpha$ -pinene SOA, rather than oxidation of isoprene after injecting  $\alpha$ -  
412 pinene.

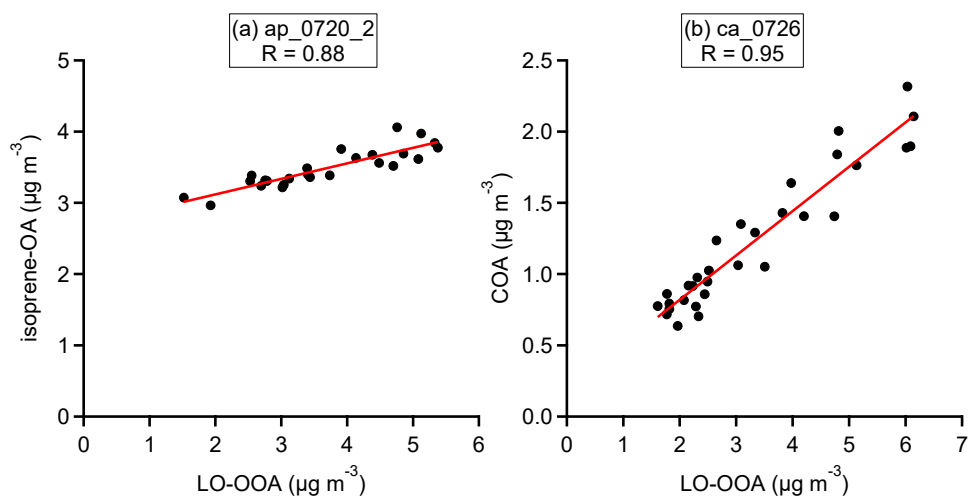

413  
414 Fig. R4. (a) The correlation between isoprene-OA and LO-OOA in the “Chamber\_Af” period of  
415 one  $\alpha$ -pinene perturbation experiment (i.e., ap\_0720\_2). (b) The correlation between COA and  
416 LO-OOA in the “Chamber\_Af” period of one  $\beta$ -caryophyllene experiment (i.e., ca\_0726).

417 At the reviewer requested, the concentrations of inorganic species have been added into  
418 the revised SI.

419 *Specific comments:*

420 5. Lines 104:111. Did the authors characterize the chamber? Mixing, wall losses,

421 Response: Since our goal is to qualitatively understand which OA factors the  $\alpha$ -pinene SOA is  
422 apportioned into, we did not characterize the mixing and wall loss of the chamber. We would like  
423 to note that because of the continuous exchange air between chamber and ambient air, the particle  
424 wall loss is difficult to characterize. The chamber characterization will be one focus of future work.

425 6. Lines 141: The authors claim that by having an overflow, it suppressed the particle loss. Did  
426 they mean reduce? Have you done some tests to validate such statement?



427 Response: We used a bypass flow to reduce the particle loss in sampling line. We have replaced  
428 “suppressed” with “reduced”.

429 *7. Lines 217-220: Why not using the outdoor chamber to do such experiments? Can the authors*  
430 *discuss the strategy here?*

431 Response: In the laboratory studies, we follow traditional chamber experimental procedure  
432 produce  $\alpha$ -pinene SOA under controlled conditions. Then we compare laboratory experiments with  
433 lab-in-the-field experiments to evaluate the representativeness of laboratory studies.

434 *8. Lines 266-268: The decay of LO-OOA is quite fast and I do not think it can only explain by the*  
435 *dilution and or dead-volume. The residence time in the chamber is ~100 min. Where were located*  
436 *the sampling inlets?*

437 Response: The ~100min residence time is calculated with the assumption of no dead volume. The  
438 existence of dead volume would largely decrease the residence time and change the decay rate of  
439 LO-OOA, as shown in Fig. S21 in revised SI.

440 The sampling inlets were inserted into the center of the chamber, which has been specified  
441 in the revised SI.

442 *9. Lines 278:284: It is quite expected. What is the point of the authors?*

443 Response: Please see response to reviewer#1’s comment#10.

444 *10. SI Line 150:157: These results are a bit intriguing. The data reported for the boreal forest do*  
445 *not exhibit prominent ions at m/z 53 or 82. The authors suggest that alpha-pinene/monoterpene*  
446 *can contribute to IEPOX-OA but according to Fig S7 the correlation is far to be obvious strong.*  
447 *The authors should compare the MS obtained in their study with other PMF data obtained from*  
448 *monoterpene-dominated areas (e.g. boreal forest).*

449 Response: In SI Line 150-157, we suggest that monoterpenes SOA may influence isoprene-OA  
450 factor, if the isoprene-OA factor is present. In other words, for a location without isoprene-OA  
451 factor, the influence of monoterpenes SOA on isoprene-OA does not exist. Regarding the  
452 reviewer’s comment on Fig. S7 (i.e., Fig S5 in revised SI), we have addressed it in response to  
453 comment#4. As the reviewer suggest, we compared the mass spectrum of LO-OOA in this study  
454 with that obtained in a coniferous forest mountain region in Whistler, British Columbia, Canada  
455 (Lee et al., 2016). The correlation coefficient is 0.99.

456 **Reviewer #3:**

457 *This paper presents results from experiments and model runs focusing on the monoterpene*  
458 *contribution to biogenic SOA in the SE US. A small Teflon reactor was used to oxidize ambient*  
459 *air to which single VOC precursor was added. Based on simple PMF analysis and simple CMAQ*  
460 *model runs, it is concluded that monoterpenes are major contributors to ambient OA in the SE US.*  
461 *The authors are wellknown in the field and have published much excellent work, the paper falls*  
462 *within the scope of ACP, and has some interesting aspects. However, in my opinion the new*  
463 *evidence is weak, partially supported with circular logic, and is very overinterpreted. The new*  
464 *evidence is very insufficient to support the very strong conclusions. I don't see how this paper can*  
465 *be published in ACP in anywhere near its present form. I recommend that the authors go back to*  
466 *the drawing board and summarize the new experimental aspects into a paper whose conclusions*  
467 *are actually supported by the evidence presented. For example, the results on Appendix B seem*  
468 *more novel to this reviewer than the ones that are described in the main paper.*

469 *Note that I made this recommendation already in the access review, with the concurrence of the*  
470 *previous Editor, and hoping to avoid having to post this review in public. However, after an appeal*  
471 *by the authors, it was decided to publish the paper in ACPD anyway without significant revisions.*

472 Response: We thank the reviewer for detailed comments in both access review and ACPD stages.  
473 We appealed the reviewer's suggestion in the access review stage because we respectfully disagree  
474 with many of the reviewer's comments. We would like to use the open discussion to clarify a  
475 number of issues.

476 *1. Brief statement of the major issue*

477 *1) The main problem of this paper is that the evidence presented does not support the conclusions.*  
478 *The conclusions are summarized in the paper title "Large Contributions from Biogenic*  
479 *Monoterpenes and Sesquiterpenes to Organic Aerosol in the Southeastern United States." Or L80-*  
480 *84: "We provide direct evidence that newly formed SOA from  $\alpha$ -pinene [...] and  $\beta$ -caryophyllene*  
481 *(representative sesquiterpene) dominantly contributes to LO-OOA in the southeastern U.S."*

482 *The new evidence presented in this manuscript has two parts:*

483 *1.a) Some interesting, but incomplete, experiments with an ambient reactor, that have been*  
484 *analyzed using PMF. What the authors have really shown with these experiments is (in their own*

485 words) “to qualitatively understand which OA factors the  $\alpha$ -pinene SOA is apportioned into”  
486 (Supp. Info. L349-350). Most importantly, experiments with other precursors failed, and  
487 experiments using for example cloud pathways were not even attempted. It is highly likely (based  
488 on prior published work) that spectra from other precursors and pathways would also have looked  
489 similar to LO-OOA, so it is very problematic that those experiments failed or were not even  
490 attempted.

491 The authors do acknowledge (L415) that based on the experimental work alone “we do not  
492 conclude that LO-OOA arises exclusively from MT and SQT.” Next, they do acknowledge that  
493 their title is just a hypothesis, after all the experimental evidence has been considered: (L387-391):  
494 “we propose that the major source of OOA in this region is the oxidation of MT and SQT by  
495 various oxidants ( $O_3$ , OH, and  $NO_3$ ). To test this hypothesis, we use CMAQ to simulate pollutant  
496 concentrations across the southeastern U.S.”

497 So given how weak the evidence from (1.a) is in terms of supporting the paper’s conclusions, how  
498 strong is the complementary evidence from the model?

499 1.b) The CMAQ model is run with a different parameterization for terpene SOA that has higher  
500 yields than a very old one. Not surprisingly, the terpene contribution to SOA in the SE US goes up  
501 in CMAQ. I understand that the parameterization is in principle improved compared to some older  
502 ones, but how do we know it is really accurate? The parameterization is still very simple, and does  
503 not included detailed chemistry such as a HOM mechanism. The justification about why this  
504 parameterization would be accurate when implemented in as complex a region as the SE US is  
505 very light and not satisfactory (sect. 2.6). I agree the model is “upgraded” (L25), but not that it  
506 has been shown to be accurate. There is a long history of simple parameterizations (after various  
507 “upgrades”) being wrong when compared to ambient air. I do not see sufficient evidence that  
508 supports the accuracy of these model runs, so that strong conclusions about MT + SQT  
509 contributions (that could not be reached with the experiments alone) could now be reached with  
510 certainty.

511 In addition, the use of the CMAQ results suffers from circular logic. Section 1.a. ended with a  
512 hypothesis that LO-OOA was arising from MT & SQT. Now the fact that the CMAQ results are of  
513 the same order as LO-OOA is used as confirmation that indeed LO-OOA comes from MT & SQT.

514 *But we did not know that LO-OOA came from MT & SQT yet, that was only a hypothesis. The*  
515 *logical structure here is therefore problematic.*

516 *Other evidence from the literature is mentioned, such as high emissions of MT & SQT in the SE*  
517 *US, and the fact that some previous results suggest that anthropogenic SOA is not a major*  
518 *contributor in this region. The first one has been known for decades. The second result is not quite*  
519 *consistent with some modeling studies and measurements of fossil carbon (when taking into*  
520 *account that urban pollution has a significant fraction of non-fossil carbon, see Kim et al. (2015)*  
521 *and references therein). Together, the combined evidence is still not sufficient for the sweeping*  
522 *conclusions.*

523 *Ten years ago we didn't know about the IEPOX-SOA pathway (Paulot et al., Science 2009), that*  
524 *has since proven to be a major contributor to SOA over the SE US. A paper written in 2008 may*  
525 *have used the existing literature to conclude that isoprene was a minor contributor to SOA in the*  
526 *SE US, and would have been sorely wrong in doing so. We also didn't know till very recently about*  
527 *autoxidation being important in the atmosphere (Ehn et al., 2014). The importance of autoxidation*  
528 *for urban emissions in the US has recently been demonstrated (Praske et al., PNAS 2018), and is*  
529 *not included in the CMAQ runs or literature studies cited here. SOA formation in clouds is also*  
530 *highly uncertain (Ervens et al., 2011), and could also lead to LO-OOA through various mixtures*  
531 *of precursors and pathways (which remain almost completely unexplored). For example perhaps*  
532 *there is an isoprene SOA pathway through clouds that has not been discovered yet and that*  
533 *contributes half of the LO-OOA in the SE US. The present paper is implicitly saying that other*  
534 *precursors and pathways are not important in the SE US, and risks shutting down research on*  
535 *other alternatives. Is that justified? In my opinion it is not, and the evidence in this paper is not*  
536 *anywhere near sufficient to justify its title and sweeping conclusions.*

537 **Response:** We think the reviewer over-states the “weakness” of our evidence and the “strongness”  
538 of our conclusion. In many places of reviewer’s comments, the reviewer indicates “the authors  
539 draw the conclusion that LO-OOA is exclusively monoterpenes SOA based on a single evidence”  
540 and that is a significant shortcoming. Our hypothesis is that “the major source of LO-OOA in the  
541 southeastern U.S. is the fresh SOA from the oxidation of monoterpenes (MT) and sesquiterpenes  
542 (SQT) by various oxidants (O<sub>3</sub>, OH, and NO<sub>3</sub>)”. We never argue that LO-OOA is exclusively MT  
543 and SQT SOA and never state that SOA from other sources/pathways is not important. While

544 monoterpenes have been recognized an important SOA source for some time, until Zhang et al.  
545 (2018), there was no evidence for them being a contributor on the order of half of the ambient OA.  
546 Even with Zhang et al. (2018), the scientific literature lacks information on the role of  
547 monoterpenes on larger spatial (e.g. entire southeast U.S.) and temporal (different times of year)  
548 scales which are included in our work. We support our hypothesis based on a weight of evidence  
549 provided in the literature and this study, as listed and discussed below.

550 (1) The large emissions of MT and SQT in the southeastern U.S. (Guenther et al., 2012), which  
551 has been established in decades and the reviewer agrees with.

552 (2) The majority (roughly 80%) of carbon in SOA is modern in the southeastern U.S. The reviewer  
553 suspects that this evidence is not quite consistent with some modeling studies. We beg to differ  
554 due to following reasons. Firstly, Weber et al. (2007) measured that the biogenic fraction of carbon  
555 is roughly 70-80% at two urban sites in Georgia that were also used in our study. Note that  
556 measurements in Weber et al. (2007) were performed in 2004 and the biogenic fraction is expected  
557 to be higher in 2016 than 2004, as a result of reductions in anthropogenic emissions (Blanchard et  
558 al., 2010). Secondly, we checked Kim et al. (2015) and found that the paper clearly stated that “we  
559 estimate that 18% of the total OC burden is derived from fossil fuel use. This is consistent with an  
560 18% fossil fraction from radiocarbon measurements made on filter samples collected in Alabama  
561 during SOAS.” In brief, Kim et al. (2015) is consistent with other studies (Zhang et al., 2018;  
562 Lewis and Stiles, 2006; Weber et al., 2007).

563 (3) Previous studies suggest that the oxidation of  $\beta$ -pinene (another important monoterpene) by  
564 nitrate radicals ( $\text{NO}_3$ ) contributes to LO-OOA in the southeastern U.S. (Boyd et al., 2015; Xu et  
565 al., 2015a) and this reaction alone cannot replicate the magnitude of LO-OOA (Pye et al., 2015).

566 (4) The mass spectra of LO-OOA are almost identical (i.e., R ranges from 0.95 to 0.99 in Fig. R1)  
567 across all the seven datasets in our study. In addition, LO-OOA across all datasets also shares the  
568 same diurnal trends (Xu et al., 2015a). The similarity in LO-OOA features suggests that LO-OOA  
569 may share similar sources across multiple sites and in different seasons in the southeastern U.S.

570 (5) Perturbation experiments in this study show that the majority of fresh SOA from the oxidation  
571 of MT and SQT contributes to LO-OOA. Previous studies, mainly based on mass spectra  
572 comparison, concluded that MT SOA contributes to LO-OOA, but did not quantitatively show the  
573 fraction of MT SOA that is apportioned into LO-OOA. In other words, previous studies did not

574 show whether 100% or 50% of MT SOA is apportioned in to LO-OOA. The quantitative  
575 understanding is the basis when comparing modeled MT SOA with PMF factors. The reviewer  
576 raises concern regarding this conclusion in next comment and we will address his/her concern later.

577 (6) CMAQ model calculations for the region showed consistency between modeled  $SOA_{MT+SQT}$   
578 and observed LO-OOA in terms of both magnitude and diurnal trend at different sites and in  
579 different seasons when an updated monoterpene SOA parameterization was used.

580 The new VBS parameterization implemented in the updated simulation represents a  
581 significant scientific improvement over the Odum 2-product parameterization currently used in the  
582 public version of CMAQ (v5.2). Specifically, the VBS parameterization does promptly form low  
583 volatility species, likely from autoxidation, which were absent from the previous Odum-2 product  
584 parameterization. In addition, the new parameterization allows for enthalpies of vaporization that  
585 are more consistent with species of the specified volatility, since the parameterization was  
586 produced from a richer dataset than the original Odum 2-product representation. The work shown  
587 here is an important step in the right direction and will allow for an improved representation of  
588 monoterpene SOA in current models while mechanistic pathways are still being determined. As  
589 shown in Fig. S16 in revised SI, implementing the new parameterization of MT SOA substantially  
590 reduces the normalized mean bias (NMB) between modeled and measured OA for all six datasets.

591 (7) A recent study by Zhang et al. (2018), which was published after our manuscript submission,  
592 offered other evidence to support our hypothesis. Zhang et al. (2018) characterized the molecular  
593 tracers of MT SOA at Centreville, AL (a site included in our study as well) and concluded that  
594 monoterpenes are the largest source of summertime organic aerosol in the southeastern U.S.

595 Therefore, we use above weight of evidence to support our hypothesis. We have revised  
596 the manuscript to clarify the logic and avoid confusions.

597 At last, we fully acknowledge the progress already made and the need to improve our  
598 understanding of atmospheric chemistry and all the unknowns the reviewer brought up. In fact,  
599 our study is motivated by many unknowns that the reviewer brought up. For example, due to the  
600 high O:C ratio of highly oxygenated molecules (HOMs) formed during monoterpene oxidation, it  
601 is hypothesized that HOMs maybe a potential source of MO-OOA. This hypothesis challenges our  
602 current understanding that MO-OOA represents aged SOA and also raises the question if  
603 monoterpenes SOA is exclusively apportioned into LO-OOA. Although previous studies

604 repeatedly showed the similar mass spectra between  $\alpha$ -pinene SOA and LO-OOA, the mass spectra  
605 comparison approach cannot tell us what is the fraction of  $\alpha$ -pinene SOA apportioned into LO-  
606 OOA vs. other factors. The limitations of mass spectra comparison approach motivate us to explore  
607 alternative approaches to understand the sources of PMF factors. Another example is still related  
608 to HOMs. As the reviewer is aware of, the formation of HOMs and the contributions of HOMs to  
609 SOA are not captured by the Odum 2-product model implemented in current regional models  
610 which do not include prompt formation of material with saturation concentrations less than 10  
611  $\mu\text{g}/\text{m}^3$ . This is one of the reasons we replaced Odum 2-product model with VBS parameterization  
612 in the updated simulation. The new parameterization based on Saha and Grieshop (2016) considers  
613 the HOMs contribution to SOA and the HOMs yield in Saha and Grieshop (2016) is consistent  
614 with recent observations.

615 Throughout the manuscript, we never imply that SOA sources, other than monoterpenes  
616 and sesquiterpenes, are not important. Based on our measurements, LO-OOA accounts for 19-34%  
617 of total OA in the southeastern U.S. The sources of MO-OOA, which accounts for 24-49% of OA  
618 in the southeastern U.S., are highly uncertain. Many reaction pathways the reviewer brought up  
619 are actually potential sources of MO-OOA. For example, SOA produced from aqueous-phase  
620 chemistry is generally highly oxidized (Lee et al., 2011) and is likely apportioned into MO-OOA,  
621 instead of LO-OOA. A recent study by Xu et al. (2016) suggests that aqueous-phase reaction has  
622 a dominant impact on MO-OOA in China. There are also hypotheses in the literature that the SOA  
623 formed through cloud chemistry together with long-range transport and entrainment from aloft  
624 may contribute to MO-OOA (Crippa et al., 2013; Robinson et al., 2011; Xu et al., 2015b). In brief,  
625 we never make any implication that SOA from other sources/pathways are not important in the  
626 southeastern U.S.

627 *A little more detail on the major issues*

628 *2) A very important problem with the manuscript is the logic of the PMF analysis (with both of the*  
629 *other reviewers explicitly pointing out serious problems in it). Indeed the  $\alpha$ -pinene SOA is most*  
630 *similar to LOOOA (also referred to as SV-OOA in older works). This has been known for a decade,*  
631 *see for example Fig 2C of Jimenez et al. (2009) (cited in the manuscript) and several other papers.*  
632 *Or in the words of reviewer 1: “the case for  $\alpha$ -pinene SOA being a strong contributor to LO-OOA*  
633 *has never really been in doubt in this reviewer’s opinion. Why is the evidence presented here any*

634 *more ‘direct’ than those published previous?’ The same conclusion can be deduced quickly by*  
635 *comparing spectra of chamber apinene SOA and ambient LO-OOA from the AMS spectral*  
636 *databases (much like the authors do again in their Fig. 6). So this it is not a new finding of this*  
637 *work. Here an interesting (though not completely new) experimental procedure is used to reach*  
638 *once again a conclusion that was already firmly established in the literature. See for example the*  
639 *figure below (Kiendler-Scharr et al., 2009, as an example, but there are quite a few such*  
640 *comparisons in the earlier AMS literature. Note that the Chebogue BSOA represents the outflow*  
641 *for the E US, similar to the work in the present paper).*

642 *Therefore the conclusion is not really new and has been known for over a decade. So it seems*  
643 *surprising that suddenly the same specific result allows the present authors to reach far more*  
644 *general conclusions. The critical flaw is in the logic flow. It is true that (a)  $\alpha$ -pinene SOA is most*  
645 *similar to LO-OOA. However, that cannot be used to conclude that (b) ambient LO-OOA in the*  
646 *SE US is mostly from apinene. Hypothesis (a) being true is a necessary, but not sufficient condition*  
647 *for the converse hypothesis (b) to be true. Much more evidence is needed to prove hypothesis (b)*  
648 *and to disprove alternative hypotheses.*

649 *A critical piece of additional evidence would include proving that spectra from other sources of*  
650 *SOA likely to be present in the region are not spectrally similar to LO-OOA. This is not shown in*  
651 *the manuscript. Experiments with other precursors were attempted (L313): “by injecting isoprene,*  
652 *m-xylene, or naphthalene, which are major biogenic and anthropogenic emissions, respectively.*  
653 *However, the SOA formation from these VOCs is not detectable.” So the experiments failed, and*  
654 *as a consequence no spectra from other likely sources are available to establish that spectra from*  
655 *those sources do not look like LO-OOA. A look at the AMS literature and the AMS databases*  
656 *suggest that spectra from these and other precursors have spectra which are indeed very similar*  
657 *to ambient LO-OOA. So it is very problematic that the experiments did fail.*

658 *Inexplicably the authors do not use the publicly available database spectra, nor perform regular*  
659 *chamber experiments for other precursors, and have a very handwavy section (sect. 3.4) trying to*  
660 *justify that. This is simply not acceptable. I do not agree that the ambient perturbation experiments*  
661 *are better than regular chamber experiments, but I would agree that they can be just as good.*  
662 *Adding  $\alpha$ -pinene to ambient air, and using the oxidants ( $O_3$  and  $OH$ ) and OA seed from ambient*  
663 *air, is not significantly different to injecting  $O_3$  in a chamber and using either a sulfate seed or no*



664 *seed. If the authors expect that the spectra would be significantly different, they should explain*  
665 *why this would be. But their own Figure 6 indicates that the spectra from the ambient perturbation*  
666 *experiments and a regular chamber are indeed very similar. Why then not use chamber*  
667 *experiments (either from the literature database, or the authors' chamber) to obtain spectra from*  
668 *other precursors and pathways, and see whether they are similar to the ambient LO-OOA or not?*

669 Response: The reviewer's comment targets on why our conclusions from perturbation experiments  
670 are more "direct" than previous studies based on mass spectra comparison method. We have  
671 carefully addressed this question in response to reviewer#1's comment#9. In brief, in the authors'  
672 opinion, the mass spectra comparison approach is subjective and qualitative. It relies on subjective  
673 judgement to determine whether lab SOA is similar to OA factor. Also, even if the mass spectrum  
674 of  $\alpha$ -pinene SOA is similar to LO-OOA, the similarity is not equivalent to that  $\alpha$ -pinene SOA is  
675 exclusively apportioned into LO-OOA. In contrast, in the perturbation approach, PMF analysis  
676 does not distinguish SOA from natural  $\alpha$ -pinene vs. from injected  $\alpha$ -pinene, so that PMF analysis  
677 can objectively apportion  $\alpha$ -pinene SOA into factors. Further, we attempt to quantify the fraction  
678 of  $\alpha$ -pinene SOA that is apportioned into different factors.

679 The reviewer also argued that it is problematic that the perturbation experiments with other  
680 VOCs (isoprene, m-xylene, or naphthalene) failed. In fact, the results with other VOCs are  
681 expected and explainable as will be discussed in response to reviewer's comment #7.

682 *3) Similar experiments and analysis (VOC addition to ambient air in a flow reactor, followed by*  
683 *spectral comparison) have already been conducted and published by Palm et al. (2018) as part of*  
684 *the GoAmazon campaign, an area comparable to the SE US with high biogenic impact, but also*  
685 *other sources. In that work multiple VOCs were added to ambient air individually, and oxidized*  
686 *to form SOA in an oxidation flow reactor, which was then measured by an HR-AMS. Those authors*  
687 *were able to oxidize bicyclic terpenes, longifolene, limonene,  $\beta$ -pinene,  $\alpha$ -pinene, toluene, and*  
688 *isoprene, and to obtain yields and HR-AMS mass spectra for all of them. They further state: "The*  
689 *mass spectrum of the SOA formed from OH oxidation [of ambient air] was correlated ( $R^2=0.72-$*   
690 *0.93; shown in Fig. S12) with spectra of the SOA formed from the injected VOCs from the standard*  
691 *injection experiments in Sect. 3.4. These correlations show that the SOA formed from OH oxidation*  
692 *of ambient air appeared similar to SOA from known precursors, but the spectra from the different*

693 *precursors appear too similar to be able to differentiate the SOA sources in ambient air from the*  
694 *spectrum alone.” Fig. S12 of that work is reproduced below for reference.*

695 *Thus the difficulty of apportioning the SOA in ambient air through this type of experiments, and*  
696 *given the high fragmentation and limited information content of AMS spectra is clear and has been*  
697 *previously documented. If the authors disagree, the burden of proof is on them to show that they*  
698 *can unequivocally associate ambient air spectra with those of specific VOC precursors, including*  
699 *disproving that ambient LO-OOA may have major contributions from other precursors and*  
700 *pathways. Let’s imagine that Palm et al. had only conducted experiments with limonene, and the*  
701 *rest of the experiments had failed. Then they would have observed R<sup>2</sup> of 0.9 between SOA of those*  
702 *experiments and SOA from ambient air. Would that have been sufficient evidence to justify the title*  
703 *“Large Contributions from limonene to Organic Aerosol in the Amazon”?* *That paper performed*  
704 *additional analyses, and concluded instead that biomass burning and anthropogenic precursors*  
705 *were also important contributors at that particular location, in addition to biogenics. Therefore*  
706 *one has to avoid making expansive conclusions based on narrow evidence.*

707 Response: Firstly, we do not agree with the reviewer that the analysis in Palm et al. (2018) is  
708 similar to our study. Palm et al. (2018) focused on the SOA formation from oxidizing ambient air  
709 with OH in an oxidation flow reactor. This SOA is referred to as “potential SOA”. Both the mass  
710 spectra comparison and the “additional analysis” the reviewer referred to aim to understand the  
711 “potential SOA”, instead of the existing SOA in the atmosphere. As clearly stated in Palm et al.  
712 (2018), “Importantly, this analysis does not provide information about what amounts or fractions  
713 of the preexisting (i.e., ambient) OA measured at the T3 site came from each of these sources.”  
714 Thus, the analysis in Palm et al. (2018) is not similar to our study, as our study aims to understand  
715 the sources of preexisting OA.

716 The reviewer quote from Palm et al. (2018) that “...*but the spectra from the different*  
717 *precursors appear too similar to be able to differentiate the SOA sources in ambient air from the*  
718 *spectrum alone.”* The R<sup>2</sup> in Palm et al. ranges from 0.72 to 0.93. We would like to ask the question  
719 what counts as “too similar”? We believe that the mass spectra comparison method cannot provide  
720 an objective answer to this question, but the PMF analysis as done in our study can potentially  
721 answer the question. That is, if Palm et al. (2018) performed PMF analysis on the combined

722 ambient data and perturbation data, SOA from different precursors may be apportioned into  
723 different factors.

724 Secondly, the reviewer raised one question that if Palm et al. had only conducted  
725 experiments with limonene, would that have been sufficient evidence to justify the title “Large  
726 Contributions from Limonene to Organic Aerosol in the Amazon”? We agree with the reviewer  
727 that the answer is definitely no, because this conclusion is drawn based on simply mass spectra  
728 comparison, instead of cumulative evidence as in our study. Let’s imagine that Palm et al. simulate  
729 the SOA formation from limonene in Amazon, would that match the LO-OOA in both magnitude  
730 and diurnal trend at multiple sites and in different seasons? Is limonene the most abundant  
731 monoterpenes in the Amazon? Is there any study to objectively show that the majority of limonene  
732 SOA contributes to LO-OOA, instead of other factors? We state again that our hypothesis is  
733 supported by a weight of evidence, instead of simple mass spectra comparison.

734 Thirdly, to support the hypothesis that LO-OOA is largely from the oxidation of  
735 monoterpenes and sesquiterpenes in the southeastern U.S., we have shown cumulative evidence in  
736 response to this reviewer’s comment#1. Below, we list more evidence to support that LO-OOA  
737 unlikely has major contributions from anthropogenic VOCs.

738 (1) m-xylene, an important and abundant anthropogenic VOC is likely apportioned to MO-  
739 OOA. The mass spectrum of laboratory-generated m-xylene SOA (Bahreini et al., 2005) is more  
740 similar to the MO-OOA ( $R = 0.97$ ) than LO-OOA ( $R = 0.83$ ), using the standard mass spectra in  
741 Ng et al. (2010). Using the reviewer’s recommendation to leverage the similarity of spectra  
742 between laboratory experiments and the ambient measurements, m-xylene SOA contributes to  
743 MO-OOA, instead of LO-OOA.

744 (2) As indicated in Fig. S8 in revised SI, the modeled concentration of SOA from  
745 anthropogenic VOCs is on the order of  $0.1 \mu\text{g m}^{-3}$ . Even if we double the SOA yields of  
746 anthropogenic VOCs to account for the potential vapor wall loss in laboratory studies (Zhang et  
747 al., 2014) and even if we assume all SOA from anthropogenic VOCs oxidation contributes to LO-  
748 OOA, anthropogenic SOA only account for a small fraction of LO-OOA. Also, the modeled  
749 anthropogenic SOA peaks in the day, which is different from that of LO-OOA, which reaches  
750 daily maximum at night. This small amount of anthropogenic SOA is consistent with Zhang et al.

751 (2018), who performed molecular-level characterization of OA and showed that anthropogenic  
752 SOA only accounts for 2% of total OA in Centreville, AL.

753 *4) Some results of the PMF analysis appear to have been misinterpreted. The ambient data had*  
754 *10 times as many points in time as the perturbation experiments. In such a situation, the ambient*  
755 *data effectively “dictates” the spectra due to its much higher fractional contribution to the Q value*  
756 *(weighed residual that PMF is minimizing). As expected in this situation (L167) “the perturbation*  
757 *experiments do not create a new factor that does not already exist in the ambient data.” Under*  
758 *that setup, the PMF results for the chamber time periods are similar to multiple linear regression*  
759 *onto the spectra already predetermined for ambient air (since the chamber results have a low*  
760 *contribution to Q, and then are unable to change the factor spectra much).*

761 *As the spectra of SOA from the chamber are being forced to be represented by a linear combination*  
762 *of a limited set of ambient spectra (which they cannot influence in practice), it is normal that some*  
763 *SOA spectra from the chamber VOC additions “project” onto more than one ambient spectrum.*  
764 *That is, if an SOA spectrum produced in the chamber is not exactly similar to one of the ambient*  
765 *spectra, PMF may be able to reduce the residual by representing those experimental spectra as a*  
766 *linear combination of two of the “basis” spectra that were determined primarily from the ambient*  
767 *data. Those results are expected and not surprising. They do not “clearly demonstrate” at all that*  
768 *if a given type of SOA was present in an ambient dataset, it would be split into two factors in the*  
769 *same way. Mathematically these are two very different situations, with very different structures*  
770 *and residual contributions. For example an ambient cooking OA (COA) factor would have a*  
771 *different time variation, which PMF would also exploit in extracting the factors, but such*  
772 *structural difference in the variance is not present here. Experiments (for example using simulated*  
773 *data) could be carried out to investigate the interference point for ambient data alone.*  
774 *Unfortunately, the authors misinterpret their results for a very specific PMF situation for non-*  
775 *ambient data, into completely unsupported general statements for PMF analyses of ambient data*  
776 *(that for example ambient COA may contain caryophyllene SOA, or that isoprene SOA may have*  
777 *interferences from  $\alpha$ -pinene SOA), even though such analyses have not been performed in this*  
778 *work! Perhaps those interferences exist, but they have not been proven by this study. Rather here*  
779 *the results of a complex PMF analysis are being misinterpreted.*

780 *In fact, the result that some of the  $\alpha$ -pinene and carophyllene SOA apportion to other factors in*  
781 *the authors' methods weakens the main stated conclusions further. Even these types of SOA are*  
782 *not quite well represented by LO-OOA and need to "lean" on other ambient factors to reduce the*  
783 *residual in PMF. Therefore making the conclusion that ambient LO-OOA is mainly from MT &*  
784 *SQT is even more weakly supported.*

785 Response: As stated in the manuscript, we designed our experiments in a way that the perturbation  
786 experiments do not influence the mass spectra of OA factors and would not create a new factor.

787         The reviewer argued that "*PMF results for the chamber time periods are similar to multiple*  
788 *linear regression onto the spectra already predetermined for ambient air*". Let's put aside whether  
789 this interpretation is correct, we think the same argument/interpretation also applies for ambient  
790 monoterpenes SOA. Imagine that there is a short period of ambient data with increasing  
791 monoterpenes SOA concentration. For this short period, one can also argue that this short period  
792 has small contribution to overall Q value and thus PMF results for this period are similar to  
793 multiple linear regression onto the spectra already predetermined for ambient air. The perturbation  
794 experiments simulate this short period with increasing  $\alpha$ -pinene SOA concentration. It does not  
795 matter how PMF treats the perturbation experiments, as long as the treatment is the same for  
796 ambient data. Therefore, conclusions drawn from perturbation experiments are applicable to  
797 ambient data from a similar situation. The perturbation experiments point out the possibility that  
798 isoprene-OA factor could have interference from  $\alpha$ -pinene SOA. This interference has not been  
799 acknowledged in previous studies and there is no study in the literature to prove that this  
800 interference does not exist. In fact, the interference of  $\alpha$ -pinene SOA on isoprene-OA factor helps  
801 to address some uncertainties regarding the isoprene-OA factor in the literature. For example, Liu  
802 et al. (2015) compared the mass spectrum of laboratory-derived IEPOX SOA with isoprene-OA  
803 factors at some sites. The authors observed stronger correlation for isoprene-OA factors resolved  
804 at Borneo (Robinson et al., 2011a) and Amazon (Chen et al., 2015), and weaker correlation at  
805 Atlanta, U.S. (Budisulistiorini et al., 2013) and Ontario, Canada (Slowik et al., 2011). As another  
806 example, the fraction of measured total IEPOX-SOA molecular tracers in isoprene-OA factor  
807 highly varies with location, ranging from 26% at Look Rock, TN (Budisulistiorini et al., 2015) to  
808 78% at Centreville, AL (Hu et al., 2015). To address the uncertainties in above two examples, one  
809 possible reason is that the isoprene-OA factors resolved at different sites are not purely from  
810 IEPOX uptake. Isoprene-OA factors likely have interference from monoterpenes SOA or other

811 sources, but the interference magnitude varies with locations. We hope to use this study to raise  
812 the public awareness of the possible interference in OA factors.

813 The reviewer proposed a great suggestion to use simulated dataset to investigate the  
814 potential interference. However, a great amount of work is required to fully carry out this idea, as  
815 the creation of the simulated dataset (i.e., what mass spectrum, time series, and concentration of  
816  $\alpha$ -pinene SOA should be used?) is complicated and subjective. It would be an entire study in itself.

817 We agree with the reviewer that the perturbation experiments do not simulate all scenarios  
818 in the atmosphere and do not consider the temporal variation. The applicability of the conclusions  
819 drawn from the specific scenario to general atmosphere warrants further exploration. We have  
820 clearly discussed the caveats of the conclusions in the revised manuscript.

821 We agree with that PMF separates factors based on features in mass spectrum and time  
822 series. However, we do not agree that the temporal variations of monoterpenes and sesquiterpenes  
823 SOA and COA can guarantee a clean separation between different sources. For example, the  
824 concentrations of many oxidation products of monoterpenes (e.g. pinonic acid, pinic acid, etc),  
825 COA, and LO-OOA show similar increasing trend near sunset (Allan et al., 2010; Xu et al., 2015b;  
826 Zhang et al., 2018). As an attempt to test if our conclusion is affected by the temporal variation,  
827 we performed perturbation experiments at different times of day (9am to 9pm) in this study.

828 *5) No uncertainty analysis, such as from bootstrapping, is performed for the PMF results. This is*  
829 *more glaring given that very strong conclusions about the identity of a major fraction of the*  
830 *ambient OA, and of potential interferences between factors are made, but we are not shown that*  
831 *the results are even statistically significant or what the uncertainties in the analysis may be.*

832 Response: As the reviewer requested, we performed 100 bootstrapping runs to quantify the  
833 uncertainty of PMF results. As shown in Fig. R5. The statistical uncertainties in the time series  
834 and mass spectra of 5 factors are small and the PMF results reported in this study are robust.

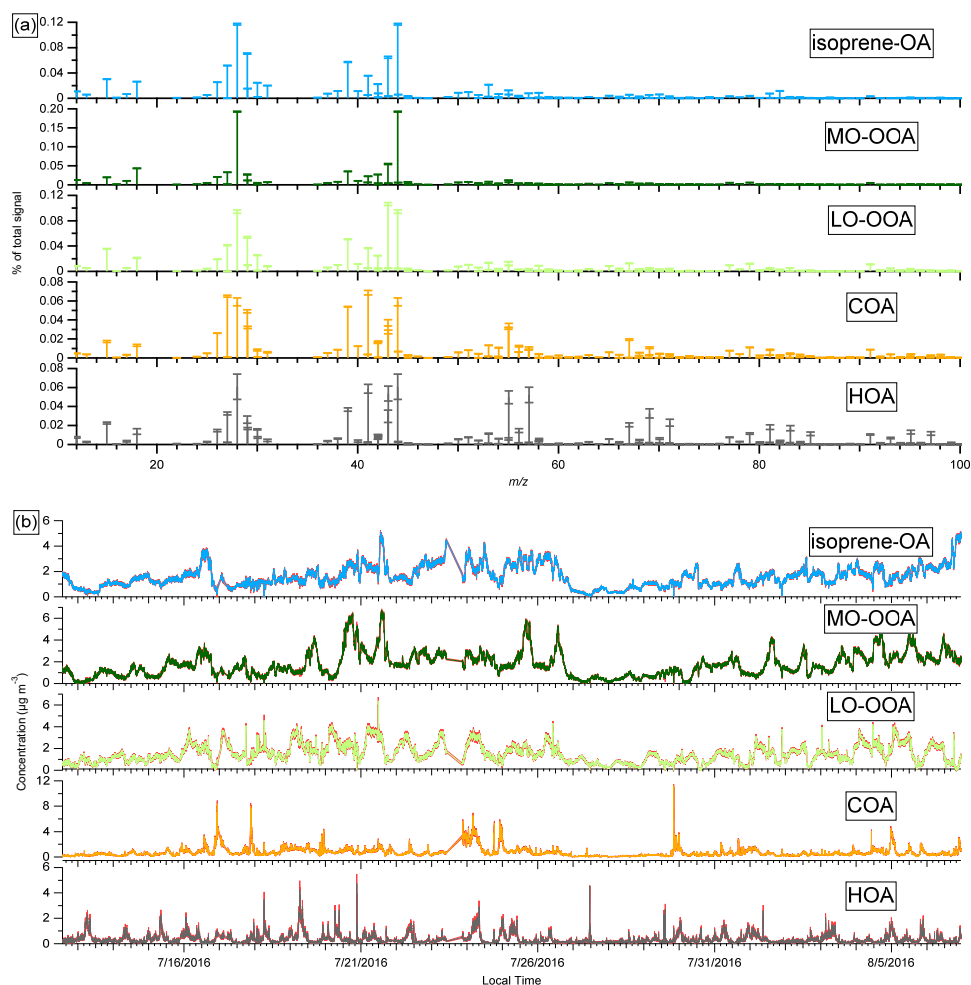

835

836

837 Fig. R5. PMF results from bootstrapping analysis. (a) Average mass spectra (sticks) with 1-σ error  
 838 bars (caps). (b) Average time series and 1-σ error bars (red).

839 *6) The statements about the novelty of the approach (L19, L21, L87-88, L457-458) are exaggerated.*  
 840 *As cited in the paper, both Leungsakul et al. (2005) and Palm et al. (2017) have already published*  
 841 *results from very similar experiments. The only difference between the present experiments and*  
 842 *those previous ones is (in the authors' words, L22-123) that "no extra oxidant precursors were*  
 843 *added into the chamber." That is correct, but would the authors expect that ambient O<sub>3</sub> or OH*  
 844 *produced from ambient air would be that different than those produced in other ways? I am sure*  
 845 *that the α-pinene molecules don't care about how the O<sub>3</sub> or OH colliding with them were formed.*  
 846 *If the authors expected that adding α-pinene to ambient air but using ambient oxidants was going*  
 847 *to significantly change the results compared to standard chamber experiments, the reasons for*  
 848 *such expectations should be discussed in detail.*

849 *Otherwise the experiments are interesting, but follow on prior publications. I mention this because*  
850 *in some places (e.g. abstract L20-25, also in L87-88, L457-458) the statement that the experiments*  
851 *were “novel” is somehow used to prop the weak conclusions. As if somehow the “novel”*  
852 *experiments would have allowed the authors to reach some conclusions that were not reachable*  
853 *by previous authors. But the novelty is very minor. And the one reason why the experiments are a*  
854 *little different from previous experiments (no added oxidants) is the reason why the experiments*  
855 *failed in multiple cases! Therefore the “novelty” does not provide any real support for the*  
856 *conclusions.*

857 Response: As the reviewer noted, we already referenced and acknowledged previous studies which  
858 used ambient air. However, the goals of previous studies are completely different from that of our  
859 perturbation experiments. In Leungsakul et al., the main purpose of using rural ambient air is to  
860 flush the 270m<sup>3</sup> outdoor chamber reactor. In Palm et al., their main goal is to measure the SOA  
861 yield from individual VOCs in the OFR under ambient RH and temperature conditions. Our goal  
862 to use ambient air is to examine which factor the fresh  $\alpha$ -pinene and  $\beta$ -caryophyllene SOA is  
863 apportioned into by PMF analysis. With our goal in mind, we want to produce SOA only from  $\alpha$ -  
864 pinene and  $\beta$ -caryophyllene. The reviewer is totally right that the  $\alpha$ -pinene molecules don't care  
865 about where the O<sub>3</sub> or OH comes from. However, adding extra oxidants will produce SOA via a  
866 number of reactions (i.e., oxidize other existing VOCs/SVOCs/IVOCs). If so, we would not  
867 unambiguously know if the LO-OOA enhancement in the perturbation experiments arise from  
868 injected VOC or from other pathways.

869 We realize that the description of the novelty of our approach is not accurate in many places  
870 and we have modified the language in the revised manuscript.

871 *7) Statements such as (L316-318) “The perturbation experiments with other VOCs confirm the*  
872 *stronger ability of  $\alpha$ -pinene and  $\beta$ -caryophyllene to produce SOA” are misleading, and frankly*  
873 *just perplexing. A lot was already known about the relative potential of different VOCs to make*  
874 *SOA before this paper, and nothing new is learned from the experiments here about this point. The*  
875 *low SOA observed for other precursors is attributed (SI, L405-406 “to the low SOA yields or slow*  
876 *oxidation rates of these VOCs (Ng et al., 2007). Yields for naphthalene are certainly not low, but*  
877 *are higher than for  $\alpha$ -pinene (Chan et al., 2009). Later it is acknowledged (SI L412-414) that*  
878 *“isoprene oxidation products which form SOA are mostly second or higher generation products.*



879 *They are not formed in large amount in the relatively short perturbation experiments (i.e., 40min)."*  
880 *The main issue is that  $\alpha$ -pinene has a lifetime of  $\sim 1$  h under the conditions of the ambient*  
881 *perturbation experiments (using well-known rate constants) and  $\beta$ -caryophyllene has an even*  
882 *shorter lifetime.  $m$ -xylene has a lifetime of  $\sim 10$  hrs, and therefore it reacts too slowly under the*  
883 *conditions of these experiments with no added oxidants. And for some precursors (other than*  
884 *isoprene) second or higher generation products are also needed to make SOA, which results in*  
885 *even longer time constants. However, those timescales are readily accessible in the atmosphere.*

886 Response: The confusion regarding the referred statement mainly arises from the phrase "stronger  
887 ability". We realize that this phrase is not properly defined, but we do not think this statement is  
888 fundamentally wrong. Here, the "stronger ability of  $\alpha$ -pinene and  $\beta$ -caryophyllene to produce SOA"  
889 means that under the same atmospheric conditions (i.e., oxidants level,  $\text{NO}_x$ , pre-existing particles,  
890 etc) and the same initial VOC concentration, more SOA would be produced from  $\alpha$ -pinene and  $\beta$ -  
891 caryophyllene than from other VOCs (i.e., isoprene,  $m$ -xylene) after the same oxidation time (i.e.,  
892 40min in perturbation experiments). This conclusion is well supported by laboratory studies in the  
893 literature. This is why we used the word "confirm" in the sentence.

894 The "*main issue is that ...*" brought up by the reviewer is exactly the same meaning as "the  
895 low SOA yields or slow oxidation rates of these VOCs", which we wrote in the original manuscript.  
896 The timescale required to produce SOA of other VOCs (i.e., isoprene and  $m$ -xylene) is longer than  
897 our perturbation experiments. This is why we did not detect SOA formation from these VOCs in  
898 our experimental approach. Thus, the results are expected and explainable.

899 After submitting the manuscript, we realize another reason for the lack of SOA formation  
900 in naphthalene experiments. We injected naphthalene by passing pure air (1 liter per min) over the  
901 solid naphthalene flakes under ambient temperature for 1 min. Due to the relatively low vapor  
902 pressure of naphthalene (23.6Pa at 30°C) and rapid dilution in the chamber, the injected  
903 naphthalene concentration could be very low. We add this possible reason in the revised SI.

904 *8) The discussion in the introduction about MO and LO OOA is unclear. Those factors do not*  
905 *represent the same sources or pathways in different studies. In some locations and times they are*  
906 *tied to biomass burning, in others to urban emissions, in others to biogenic SOA, and in others to*  
907 *various combinations. In older studies in which Isoprene-SOA (or "IEPOX-SOA) was not*  
908 *separated, it was necessarily part of MO and LO OOA. Care should be taken to clearly*

909 *communicate that any interpretations about sources contributing to MO or LO OOA are specific*  
910 *to a given location and time period. And the possibility should be considered (including in the SE*  
911 *US) that different periods may have larger contributions to these factors from different sources,*  
912 *for example BB during one period, pollution during another, and biogenics during another (if the*  
913 *sources impacting a site change substantially in time due to air mass changes or other causes).*  
914 *See e.g. Palm et al. (2018) for an example of such a situation.*

915 Response: We agree that the OOA factors represent different sources or pathways in different  
916 regions. For example, in the original manuscript, we stated that “There is evidence that LO-OOA  
917 in California is related to the oxidation of anthropogenic VOCs, as radiocarbon analysis suggests  
918 68-75% of carbon in LO-OOA in California stems from fossil sources (Hayes et al., 2013; Zotter  
919 et al., 2014).” We have further emphasized these points in the revised manuscript and expanded  
920 the discussions on OOA factors in the introduction, as the reviewer requested.

921 While we agree with the reviewer that interpretations about the sources contributing to  
922 OOA factors are location- and time-specific, we would like to point out that our study includes  
923 measurements at multiple sites in the southeastern U.S. and in different seasons. The LO-OOA  
924 across all datasets have similar diurnal variation (Xu et al., 2015a) and mass spectra (Fig. R1).  
925 Moreover, the modeled SOA<sub>MT+SQT</sub> can capture the magnitude and diurnal variation of measured  
926 LO-OOA at all datasets. These evidence suggests a general source of LO-OOA on a regional scale.

927 *Other points*

928 9) L71-72: “The assumption that LO-OOA represents fresh SOA has yet to be directly verified.”  
929 Fig 2C, 2D, 2E in Jimenez et al. (2009) (where the older terminology SV-OOA was used for LO-  
930 OOA), and similar results in other publications, would appear to have directly verified that long  
931 ago.

932 Response: Please see response to reviewer#1’s comment#9.

933 10) A paper with a similar title to this one, but using different lines of evidence, has been recently  
934 published (Zhang et al., 2018).

935 Response: Thanks for pointing this out. We note that Zhang et al. (2018) was published after our  
936 manuscript submission. The conclusion in Zhang et al. (2018) is consistent with our study and has  
937 been discussed in the revised manuscript.

938

939 Reference

- 940 Allan, J. D., Williams, P. I., Morgan, W. T., Martin, C. L., Flynn, M. J., Lee, J., Nemitz, E., Phillips,  
941 G. J., Gallagher, M. W., and Coe, H.: Contributions from transport, solid fuel burning and cooking  
942 to primary organic aerosols in two UK cities, *Atmos. Chem. Phys.*, 10, 647-668, 10.5194/acp-10-  
943 647-2010, 2010.
- 944
- 945 Bahreini, R., Keywood, M. D., Ng, N. L., Varutbangkul, V., Gao, S., Flagan, R. C., Seinfeld, J.  
946 H., Worsnop, D. R., and Jimenez, J. L.: Measurements of Secondary Organic Aerosol from  
947 Oxidation of Cycloalkenes, Terpenes, and m-Xylene Using an Aerodyne Aerosol Mass  
948 Spectrometer, *Environ Sci Technol*, 39, 5674-5688, 10.1021/es048061a, 2005.
- 949
- 950 Blanchard, C. L., Hidy, G. M., Tanenbaum, S., Rasmussen, R., Watkins, R., and Edgerton, E.:  
951 NMOC, ozone, and organic aerosol in the southeastern United States, 1999-2007 1 Spatial and  
952 temporal variations of NMOC concentrations and composition in Atlanta, Georgia, *Atmospheric*  
953 *Environment*, 44, 4827-4839, DOI 10.1016/j.atmosenv.2010.08.036, 2010.
- 954
- 955 Boyd, C. M., Sanchez, J., Xu, L., Eugene, A. J., Nah, T., Tuet, W. Y., Guzman, M. I., and Ng, N.  
956 L.: Secondary organic aerosol formation from the  $\beta$ -pinene+NO<sub>3</sub> system: effect of humidity and  
957 peroxy radical fate, *Atmos. Chem. Phys.*, 15, 7497-7522, 10.5194/acp-15-7497-2015, 2015.
- 958
- 959 Crippa, M., Canonaco, F., Slowik, J. G., El Haddad, I., DeCarlo, P. F., Mohr, C., Heringa, M. F.,  
960 Chirico, R., Marchand, N., Temime-Roussel, B., Abidi, E., Poulain, L., Wiedensohler, A.,  
961 Baltensperger, U., and Prévôt, A. S. H.: Primary and secondary organic aerosol origin by combined  
962 gas-particle phase source apportionment, *Atmos. Chem. Phys.*, 13, 8411-8426, 10.5194/acp-13-  
963 8411-2013, 2013.
- 964
- 965 Guenther, A., Jiang, X., Heald, C. L., Sakulyanontvittaya, T., Duhl, T., Emmons, L. K., and Wang,  
966 X.: The Model of Emissions of Gases and Aerosols from Nature version 2.1 (MEGAN2.1): an  
967 extended and updated framework for modeling biogenic emissions, *Geosci. Model Dev.*, 5, 1471-  
968 1492, 10.5194/gmd-5-1471-2012, 2012.
- 969
- 970 Helmig, D., Ortega, J., Duhl, T., Tanner, D., Guenther, A., Harley, P., Wiedinmyer, C., Milford,  
971 J., and Sakulyanontvittaya, T.: Sesquiterpene Emissions from Pine Trees – Identifications,  
972 Emission Rates and Flux Estimates for the Contiguous United States, *Environ Sci Technol*, 41,  
973 1545-1553, 10.1021/es0618907, 2007.
- 974
- 975 Jimenez, J. L., Canagaratna, M. R., Donahue, N. M., Prevot, A. S. H., Zhang, Q., Kroll, J. H.,  
976 DeCarlo, P. F., Allan, J. D., Coe, H., Ng, N. L., Aiken, A. C., Docherty, K. S., Ulbrich, I. M.,  
977 Grieshop, A. P., Robinson, A. L., Duplissy, J., Smith, J. D., Wilson, K. R., Lanz, V. A., Hueglin,  
978 C., Sun, Y. L., Tian, J., Laaksonen, A., Raatikainen, T., Rautiainen, J., Vaattovaara, P., Ehn, M.,  
979 Kulmala, M., Tomlinson, J. M., Collins, D. R., Cubison, M. J., Dunlea, E. J., Huffman, J. A.,  
980 Onasch, T. B., Alfarra, M. R., Williams, P. I., Bower, K., Kondo, Y., Schneider, J., Drewnick, F.,  
981 Borrmann, S., Weimer, S., Demerjian, K., Salcedo, D., Cottrell, L., Griffin, R., Takami, A.,

982 Miyoshi, T., Hatakeyama, S., Shimono, A., Sun, J. Y., Zhang, Y. M., Dzepina, K., Kimmel, J. R.,  
983 Sueper, D., Jayne, J. T., Herndon, S. C., Trimborn, A. M., Williams, L. R., Wood, E. C.,  
984 Middlebrook, A. M., Kolb, C. E., Baltensperger, U., and Worsnop, D. R.: Evolution of Organic  
985 Aerosols in the Atmosphere, *Science*, 326, 1525-1529, DOI 10.1126/science.1180353, 2009.  
986

987 Kim, P. S., Jacob, D. J., Fisher, J. A., Travis, K., Yu, K., Zhu, L., Yantosca, R. M., Sulprizio, M.  
988 P., Jimenez, J. L., Campuzano-Jost, P., Froyd, K. D., Liao, J., Hair, J. W., Fenn, M. A., Butler, C.  
989 F., Wagner, N. L., Gordon, T. D., Welti, A., Wennberg, P. O., Crounse, J. D., St. Clair, J. M., Teng,  
990 A. P., Millet, D. B., Schwarz, J. P., Markovic, M. Z., and Perring, A. E.: Sources, seasonality, and  
991 trends of southeast US aerosol: an integrated analysis of surface, aircraft, and satellite observations  
992 with the GEOS-Chem chemical transport model, *Atmos. Chem. Phys.*, 15, 10411-10433,  
993 10.5194/acp-15-10411-2015, 2015.  
994

995 Lee, A. K. Y., Herckes, P., Leaitch, W. R., Macdonald, A. M., and Abbatt, J. P. D.: Aqueous OH  
996 oxidation of ambient organic aerosol and cloud water organics: Formation of highly oxidized  
997 products, *Geophysical Research Letters*, 38, n/a-n/a, 10.1029/2011GL047439, 2011.  
998

999 Lee, A. K. Y., Abbatt, J. P. D., Leaitch, W. R., Li, S. M., Sjostedt, S. J., Wentzell, J. J. B., Liggio,  
1000 J., and Macdonald, A. M.: Substantial secondary organic aerosol formation in a coniferous forest:  
1001 observations of both day- and nighttime chemistry, *Atmos. Chem. Phys.*, 16, 6721-6733,  
1002 10.5194/acp-16-6721-2016, 2016.  
1003

1004 Lewis, C. W., and Stiles, D. C.: Radiocarbon Content of PM<sub>2.5</sub> Ambient Aerosol in Tampa, FL,  
1005 *Aerosol Sci Tech*, 40, 189-196, 10.1080/02786820500521007, 2006.  
1006

1007 Milic, A., Mallet, M. D., Cravigan, L. T., Alroe, J., Ristovski, Z. D., Selleck, P., Lawson, S. J.,  
1008 Ward, J., Desservettaz, M. J., Paton-Walsh, C., Williams, L. R., Keywood, M. D., and Miljevic,  
1009 B.: Biomass burning and biogenic aerosols in northern Australia during the SAFIRED campaign,  
1010 *Atmos. Chem. Phys.*, 17, 3945-3961, 10.5194/acp-17-3945-2017, 2017.  
1011

1012 Ng, N. L., Canagaratna, M. R., Zhang, Q., Jimenez, J. L., Tian, J., Ulbrich, I. M., Kroll, J. H.,  
1013 Docherty, K. S., Chhabra, P. S., Bahreini, R., Murphy, S. M., Seinfeld, J. H., Hildebrandt, L.,  
1014 Donahue, N. M., DeCarlo, P. F., Lanz, V. A., Prevot, A. S. H., Dinar, E., Rudich, Y., and Worsnop,  
1015 D. R.: Organic aerosol components observed in Northern Hemispheric datasets from Aerosol Mass  
1016 Spectrometry, *Atmos Chem Phys*, 10, 4625-4641, DOI 10.5194/acp-10-4625-2010, 2010.  
1017

1018 Palm, B. B., de Sá, S. S., Day, D. A., Campuzano-Jost, P., Hu, W., Seco, R., Sjostedt, S. J., Park,  
1019 J. H., Guenther, A. B., Kim, S., Brito, J., Wurm, F., Artaxo, P., Thalman, R., Wang, J., Yee, L. D.,  
1020 Wernis, R., Isaacman-VanWertz, G., Goldstein, A. H., Liu, Y., Springston, S. R., Souza, R.,  
1021 Newburn, M. K., Alexander, M. L., Martin, S. T., and Jimenez, J. L.: Secondary organic aerosol  
1022 formation from ambient air in an oxidation flow reactor in central Amazonia, *Atmos. Chem. Phys.*,  
1023 18, 467-493, 10.5194/acp-18-467-2018, 2018.  
1024

1025 Pye, H. O. T., Luecken, D. J., Xu, L., Boyd, C. M., Ng, N. L., Baker, K. R., Ayres, B. R., Bash, J.  
1026 O., Baumann, K., Carter, W. P. L., Edgerton, E., Fry, J. L., Hutzell, W. T., Schwede, D. B., and  
1027 Shepson, P. B.: Modeling the Current and Future Roles of Particulate Organic Nitrates in the  
1028 Southeastern United States, *Environ Sci Technol*, 49, 14195-14203, 10.1021/acs.est.5b03738,  
1029 2015.  
1030

1031 Reyes-Villegas, E., Priestley, M., Ting, Y. C., Haslett, S., Bannan, T., Le Breton, M., Williams, P.  
1032 I., Bacak, A., Flynn, M. J., Coe, H., Percival, C., and Allan, J. D.: Simultaneous aerosol mass  
1033 spectrometry and chemical ionisation mass spectrometry measurements during a biomass burning  
1034 event in the UK: insights into nitrate chemistry, *Atmos. Chem. Phys.*, 18, 4093-4111, 10.5194/acp-  
1035 18-4093-2018, 2018.  
1036

1037 Robinson, N. H., Newton, H. M., Allan, J. D., Irwin, M., Hamilton, J. F., Flynn, M., Bower, K. N.,  
1038 Williams, P. I., Mills, G., Reeves, C. E., McFiggans, G., and Coe, H.: Source attribution of Bornean  
1039 air masses by back trajectory analysis during the OP3 project, *Atmos. Chem. Phys.*, 11, 9605-9630,  
1040 10.5194/acp-11-9605-2011, 2011.  
1041

1042 Saha, P. K., and Grieshop, A. P.: Exploring Divergent Volatility Properties from Yield and  
1043 Thermodynamic Measurements of Secondary Organic Aerosol from  $\alpha$ -Pinene Ozonolysis, *Environ*  
1044 *Sci Technol*, 10.1021/acs.est.6b00303, 2016.  
1045

1046 Sun, Y., Du, W., Fu, P., Wang, Q., Li, J., Ge, X., Zhang, Q., Zhu, C., Ren, L., Xu, W., Zhao, J.,  
1047 Han, T., Worsnop, D. R., and Wang, Z.: Primary and secondary aerosols in Beijing in winter:  
1048 sources, variations and processes, *Atmos. Chem. Phys.*, 16, 8309-8329, 10.5194/acp-16-8309-  
1049 2016, 2016.  
1050

1051 Tasoglou, A., and Pandis, S. N.: Formation and chemical aging of secondary organic aerosol  
1052 during the  $\beta$ -caryophyllene oxidation, *Atmos. Chem. Phys.*, 15, 6035-6046, 10.5194/acp-15-6035-  
1053 2015, 2015.  
1054

1055 Weber, R. J., Sullivan, A. P., Peltier, R. E., Russell, A., Yan, B., Zheng, M., de Gouw, J., Warneke,  
1056 C., Brock, C., Holloway, J. S., Atlas, E. L., and Edgerton, E.: A study of secondary organic aerosol  
1057 formation in the anthropogenic-influenced southeastern United States, *J Geophys Res-Atmos*, 112,  
1058 Artn D13302 Doi 10.1029/2007jd008408, 2007.  
1059

1060 Xu, L., Guo, H., Boyd, C. M., Klein, M., Bougiatioti, A., Cerully, K. M., Hite, J. R., Isaacman-  
1061 VanWertz, G., Kreisberg, N. M., Knote, C., Olson, K., Koss, A., Goldstein, A. H., Hering, S. V.,  
1062 de Gouw, J., Baumann, K., Lee, S.-H., Nenes, A., Weber, R. J., and Ng, N. L.: Effects of  
1063 anthropogenic emissions on aerosol formation from isoprene and monoterpenes in the southeastern  
1064 United States, *Proceedings of the National Academy of Sciences*, 112, 37-42,  
1065 10.1073/pnas.1417609112, 2015a.  
1066

1067 Xu, L., Suresh, S., Guo, H., Weber, R. J., and Ng, N. L.: Aerosol characterization over the  
1068 southeastern United States using high-resolution aerosol mass spectrometry: spatial and seasonal  
1069 variation of aerosol composition and sources with a focus on organic nitrates, *Atmos. Chem. Phys.*,  
1070 15, 7307-7336, 10.5194/acp-15-7307-2015, 2015b.  
1071

1072 Xu, W., Han, T., Du, W., Wang, Q., Chen, C., Zhao, J., Zhang, Y., Li, J., Fu, P., Wang, Z.,  
1073 Worsnop, D. R., and Sun, Y.: Effects of Aqueous-Phase and Photochemical Processing on  
1074 Secondary Organic Aerosol Formation and Evolution in Beijing, China, *Environ Sci Technol*,  
1075 10.1021/acs.est.6b04498, 2016.  
1076

1077 Zhang, H., Yee, L. D., Lee, B. H., Curtis, M. P., Worton, D. R., Isaacman-VanWertz, G., Offenberg,  
1078 J. H., Lewandowski, M., Kleindienst, T. E., Beaver, M. R., Holder, A. L., Lonneman, W. A.,  
1079 Docherty, K. S., Jaoui, M., Pye, H. O. T., Hu, W., Day, D. A., Campuzano-Jost, P., Jimenez, J. L.,  
1080 Guo, H., Weber, R. J., de Gouw, J., Koss, A. R., Edgerton, E. S., Brune, W., Mohr, C., Lopez-  
1081 Hilfiker, F. D., Lutz, A., Kreisberg, N. M., Spielman, S. R., Hering, S. V., Wilson, K. R., Thornton,  
1082 J. A., and Goldstein, A. H.: Monoterpenes are the largest source of summertime organic aerosol in  
1083 the southeastern United States, *Proceedings of the National Academy of Sciences*,  
1084 10.1073/pnas.1717513115, 2018.  
1085

1086 Zhang, Q., Jimenez, J. L., Canagaratna, M. R., Ulbrich, I. M., Ng, N. L., Worsnop, D. R., and Sun,  
1087 Y. L.: Understanding atmospheric organic aerosols via factor analysis of aerosol mass  
1088 spectrometry: a review, *Anal Bioanal Chem*, 401, 3045-3067, DOI 10.1007/s00216-011-5355-y,  
1089 2011.  
1090

1091 Zhang, X., Cappa, C. D., Jathar, S. H., McVay, R. C., Ensberg, J. J., Kleeman, M. J., and Seinfeld,  
1092 J. H.: Influence of vapor wall loss in laboratory chambers on yields of secondary organic aerosol,  
1093 *Proceedings of the National Academy of Sciences*, 10.1073/pnas.1404727111, 2014.  
1094
